# Supplementary material for: Synthesis and electronic structure analysis of the actinide allenylidenes, [{(NR2)3}An(CCCPh2)]− (An = U, Th; R = SiMe3)
Source: PubMed Central journal article supplement — Chem Sci. 2021 Oct 4;12(43):14383–8. doi: 10.1039/d1sc04666g (PMC8580070; doi:10.1039/d1sc04666g), 2021-10-04
Supplement: SC-012-D1SC04666G-s001.pdf [file SC-012-D1SC04666G-s001.pdf]

Supporting information for:

**Synthesis and Electronic Structure Analysis of the Actinide Allenylidenes,  
[{(NR<sub>2</sub>)<sub>3</sub>An(CCCPh<sub>2</sub>)]<sup>-</sup> (An = U, Th; R = SiMe<sub>3</sub>)**

Greggory T. Kent<sup>†#</sup>, Xiaojuan Yu<sup>‡#</sup>, Guang Wu<sup>†</sup>, Jochen Autschbach<sup>‡\*</sup>, Trevor W. Hayton<sup>†\*</sup>

<sup>†</sup>Department of Chemistry and Biochemistry, University of California Santa Barbara, Santa Barbara, CA 93106, United States

<sup>‡</sup>Department of Chemistry, University at Buffalo, State University of New York, Buffalo, NY 14260

\*To whom correspondence should be addressed. Email: hayton@chem.ucsb.edu,  
jochena@buffalo.edu

<sup>#</sup>These authors contributed equally

## Table of Contents

---

|                             |     |
|-----------------------------|-----|
| Experimental Details        | S2  |
| Computational Details       | S7  |
| NMR Spectra                 | S15 |
| X-ray Crystallographic Data | S23 |
| UV–Vis Spectra              | S24 |
| IR Spectra                  | S25 |
| Cartesian Coordinates       | S29 |
| References                  | S38 |

---

## Experimental

**General.** All reactions and subsequent manipulations were performed under anaerobic and anhydrous conditions under an atmosphere of dinitrogen. Diethyl ether (Et<sub>2</sub>O), pentane and hexanes were dried using a Vacuum Atmospheres DRI-SOLV Solvent Purification system and stored over 3Å sieves for 24 h prior to use. Tetrahydrofuran (THF) was distilled over calcium hydride then distilled over sodium benzophenone, collected, and stored over 3Å sieves for 24 h prior to use. Isooctane was distilled over sodium benzophenone, collected, and stored over 3Å sieves for 24 h prior to use. THF-*d*<sub>8</sub> and C<sub>6</sub>D<sub>6</sub> were stored over 3Å sieves for 24 h prior to use. [UCl(NR<sub>2</sub>)<sub>3</sub>] (R = SiMe<sub>3</sub>), [ThCl(NR<sub>2</sub>)<sub>3</sub>], LDA, and 3,3-diphenylcyclopropene were synthesized according to previously reported literature procedures.<sup>1-4</sup> All other reagents were purchased from commercial vendors and used as received.

<sup>1</sup>H, <sup>13</sup>C{<sup>1</sup>H}, and <sup>7</sup>Li{<sup>1</sup>H} NMR spectra were recorded on a Varian UNITY INOVA 400 MHz or a Varian UNITY INOVA 500 MHz spectrometer. <sup>1</sup>H and <sup>13</sup>C{<sup>1</sup>H} NMR spectra were referenced to external SiMe<sub>4</sub> using the residual protio solvent peaks as internal standards.<sup>5, 6</sup> <sup>7</sup>Li{<sup>1</sup>H} spectra were referenced to a saturated LiCl solution in D<sub>2</sub>O. IR spectra were recorded on a Nicolet 6700 FT-IR spectrometer with a NXR FT Raman Module. Electronic absorption spectra were recorded on a Shimadzu UV3600 UV-NIR Spectrometer. Elemental analyses were performed by the Microanalytical Laboratory at University of California (Berkeley, CA).

**Caution!** Depleted uranium (isotope <sup>238</sup>U) and natural thorium are weak alpha emitters with a half-life of 4.47×10<sup>9</sup> years and 1.41×10<sup>10</sup> years, respectively. Manipulations and reactions should be carried out in a fume hood or inert atmosphere glovebox in a laboratory equipped with α- and β-counting equipment.

**X-ray Crystallography:** Data for complexes **1** - **4**·C<sub>5</sub>H<sub>12</sub> were collected on a Bruker KAPPA APEX II diffractometer equipped with an APEX II CCD detector using a TRIUMPH monochromator with a Mo Kα X-ray source (α = 0.71073 Å). The crystals were mounted on a cryoloop under Paratone-N oil, and data were collected at 110(2) K using an Oxford nitrogen gas cryostream system. X-ray data for **1**, **2**, **3**·C<sub>5</sub>H<sub>12</sub>, and **4**·C<sub>5</sub>H<sub>12</sub> were collected utilizing frame exposures of 5, 10, 10, and 20 s, respectively. Data collection and cell parameter determination were conducted using the SMART program.<sup>7</sup> Integration of the data frames and final cell parameter refinement were performed using SAINT software.<sup>8</sup> Absorption corrections of the data

were carried out using the multi-scan method SADABS.<sup>9</sup> Subsequent calculations were carried out using SHELXTL.<sup>10</sup> Structure determination was done using direct or Patterson methods and difference Fourier techniques. All hydrogen atom positions were idealized, and rode on the atom of attachment. Structure solution, refinement, graphics, and creation of publication materials were performed using SHELXTL.<sup>10</sup>

The pentane solvate molecule in **3**·C<sub>5</sub>H<sub>12</sub> exhibited positional disorder, as a result the pentane carbon atoms were constrained using the SADI and EADP commands and refined isotopically. The cryptand ligand in **3**·C<sub>5</sub>H<sub>12</sub> also contained slight positional disorder and as a result the temperature factors of the carbon and nitrogen atoms were constrained using the EADP command. The pentane solvate in **4**·C<sub>5</sub>H<sub>12</sub> contained more severe disorder, as a result it was constrained using the SADI and EADP commands, refined isotopically and hydrogen atoms were not assigned. The cryptand moiety in **4**·C<sub>5</sub>H<sub>12</sub> contained unresolved positional disorder, as a result carbon and oxygen atom temperature factors were constrained using the EADP command, and the lithium and nitrogen atoms were refined isotopically. Bond distances on the cryptand moiety were constrained using SADI command and three hydrogen-hydrogen distances were constrained, using the DFIX command, to a distance of 1.99 Å.

Further crystallographic details can be found in Tables S8. Complexes **1-4** have been deposited in the Cambridge Structural Database (**1**: CCDC 2098903; **2**: CCDC 2098904; **3**·C<sub>5</sub>H<sub>12</sub>: CCDC 2098905; **4**·C<sub>5</sub>H<sub>12</sub>: CCDC 2098906).

**Synthesis of [(NR<sub>2</sub>)<sub>3</sub>U(CH=C=CPh<sub>2</sub>)] (1).** To a cold (-25 °C), colorless Et<sub>2</sub>O solution (0.5 mL) of 3,3-diphenylcyclopropene (42.1 mg, 0.0.219 mmol) was added quickly a cold (-25 °C), colorless Et<sub>2</sub>O solution (0.5 mL) of LDA (22.3 mg, 0.208 mmol). Immediately, the solution turned light yellow. This solution was then added drop wise to a cold (-25 °C) stirring pink slurry of [UCl(NR<sub>2</sub>)<sub>3</sub>] (157.2 mg, 0.208 mmol) in Et<sub>2</sub>O (3 mL). The stirring solution immediately turned red-brown concomitant with the deposition of a light tan precipitate. After stirring for 45 min the resulting brown solution was filtered through a Celite column supported on glass wool (0.5 cm × 2 cm) and the volatiles were removed from the filtrate *in vacuo*. The resulting brown oil was extracted into pentane (4 mL), filtered through a Celite column supported on glass wool (0.5 cm ×

2 cm) and the volatiles were removed from the filtrate *in vacuo*, yielding a brown solid. The resulting brown powder was extracted again into pentane (2 mL), filtered through a Celite column supported on glass wool (0.5 cm × 2 cm) and transferred to a 4 mL scintillation vial. This vial was placed into a 20 mL scintillation vial and the solution was concentrated to 0.5 mL. Isooctane (2 mL) was added to the outer vial and storage of this two-vial system at -25 °C for 24 h resulted in the deposition of brown blocks. Decanting the supernatant, rinsing the crystals with cold (-25 °C) pentane (2 mL), and drying *in vacuo* afforded **1** (137.3 mg, 72.4 % yield) Anal. Calcd for UN<sub>3</sub>Si<sub>6</sub>C<sub>33</sub>H<sub>65</sub>: C, 43.53; H, 7.20; N, 4.62. Found: C, 43.34; H, 7.03; N, 4.68. <sup>1</sup>H NMR (C<sub>6</sub>D<sub>6</sub>/THF-*d*<sub>8</sub>, 298 K, 500 MHz): δ 3.34 (t, *J* = 7.1 Hz, 4H, *m*-CH), 3.03 (t, *J* = 7.2 Hz, 2H, *p*-CH), -1.84 (br. s, 54H, CH<sub>3</sub>), -9.13 (d, *J* = 7.1 Hz, 4H, *o*-CH), -174.80 (s, 1H, α-CH). IR (KBr pellet, cm<sup>-1</sup>): 2954 (m), 2897 (w), 1936 (w, C<sub>α</sub>-C<sub>β</sub> stretch), 1871 (w, C<sub>β</sub>-C<sub>γ</sub> stretch), 1400 (w), 1250 (s), 1182 (w), 904 (s), 847 (s), 769 (m), 681 (w), 656 (w), 611 (m).

**Synthesis of [(NR<sub>2</sub>)<sub>3</sub>Th(CH=C=CPh<sub>2</sub>)] (2).** To a cold (-25 °C), colorless Et<sub>2</sub>O solution (0.5 mL) of 3,3-diphenylcyclopropene (40.5 mg, 0.211 mmol) was added quickly a cold (-25 °C), colorless Et<sub>2</sub>O solution (0.5 mL) of LDA (21.4 mg, 0.200 mmol). Immediately, the solution turned light yellow. This solution was then added drop wise to a cold (-25 °C) stirring colorless slurry of [Th(Cl)(NR<sub>2</sub>)<sub>3</sub>] (150.2 mg, 0.200 mmol) in Et<sub>2</sub>O (3 mL). The stirring solution immediately turned yellow-orange concomitant with the deposition of a light tan precipitate. After stirring for 45 min the resulting orange suspension was filtered through a Celite column supported on glass wool (0.5 cm × 2 cm) and the volatiles were removed from the filtrate *in vacuo*. The resulting orange oil was extracted into pentane (4 mL), filtered through a Celite column supported on glass wool (0.5 cm × 2 cm) and the volatiles were removed from the filtrate *in vacuo*, yielding a brown solid. The resulting orange oil was extracted again into pentane (2 mL), filtered through a Celite column supported on glass wool (0.5 cm × 2 cm) and transferred to a 4 mL scintillation vial. This vial was placed into a 20 mL scintillation vial and the solution was concentrated to 0.5 mL. Isooctane (2 mL) was added to the outer vial and storage of this two-vial system at -25 °C for 24 h resulted in the deposition of off-white blocks. Decanting the supernatant, rinsing the crystals with cold (-25 °C) pentane (2 mL), and drying *in vacuo* afforded **2** (112.0 mg, 61.7 % yield) Anal. Calcd for ThN<sub>3</sub>Si<sub>6</sub>C<sub>33</sub>H<sub>65</sub>: C, 43.82; H, 7.24; N, 4.65. Found: C, 43.71; H, 7.03; N, 4.57. <sup>1</sup>H NMR (C<sub>6</sub>D<sub>6</sub>/THF-*d*<sub>8</sub>, 298 K, 500 MHz): δ = 7.42 (d, *J* = 7.3 Hz, 4H,

*o*-CH), 7.17 (t,  $J = 7.7$  Hz, 4H, *m*-CH), 6.96 (d,  $J = 7.4$  Hz, 2H, *p*-CH), 5.77 (s, 1H,  $\alpha$ -CH), 0.27 (s, 54H, CH<sub>3</sub>). <sup>13</sup>C{<sup>1</sup>H} NMR (C<sub>6</sub>D<sub>6</sub>/THF-*d*<sub>8</sub>, 298 K, 126 MHz)  $\delta$  204.67 (C <sub>$\beta$</sub> ), 150.63 (C<sub>ipso</sub>), 139.38 (C <sub>$\alpha$</sub> ), 128.89 (C<sub>ortho</sub>), 128.39 (C<sub>meta</sub>), 125.63 (C<sub>para</sub>), 96.72 (C <sub>$\gamma$</sub> ), 4.57. IR (KBr pellet, cm<sup>-1</sup>): 2953 (m), 2895 (w), 1934 (w, C <sub>$\alpha$</sub> -C <sub>$\beta$</sub>  stretch), 1869 (m, C <sub>$\beta$</sub> -C <sub>$\gamma$</sub>  stretch), 1597 (m), 1491 (m), 1450 (m), 1252 (s), 1182 (m), 1113 (w), 1072 (w), 1030 (w), 931 (s), 847 (s), 768 (s), 696 (s), 658 (w), 640 (w), 609 (m).

**Synthesis of [Li(2.2.2-Cryptand)][{(NR<sub>2</sub>)<sub>3</sub>U(CCCPh<sub>2</sub>)] (3).** To a cold (-25 °C), dark brown Et<sub>2</sub>O solution (3 mL) of **1** (65.8 mg, 0.072 mmol) and 2.2.2-cryptand (27.2 mg, 0.072 mmol) was added dropwise a cold (-25 °C), colorless Et<sub>2</sub>O solution (0.5 mL) of LDA (7.74 mg, 0.072 mmol). Upon addition, the solution turned dark purple-red. After 2 min, the solution was concentrated *in vacuo* to 0.5 mL and filtered through a Celite column supported on glass wool (0.5 cm × 2 cm) into a 4 mL scintillation vial. This vial was placed into a 20 mL scintillation vial and isoctane (2 mL) was added to the outer vial. Storage of this two-vial system at -25 °C for 48 h resulted in the deposition of dark purple solid. Decanting off the supernatant, rinsing with pentane (2 mL), and drying *in vacuo* afforded **3** as an analytically pure dark purple solid (50.0 mg, 53.5 % yield). X-ray quality crystals of **3** were grown by dissolving 40 mg of this material in THF:pentane (0.25:2.5 mL). Storage of this solution at -25 °C for 24 h resulted in the deposition of dark purple needles. Anal. Calcd for C<sub>51</sub>H<sub>100</sub>LiN<sub>5</sub>O<sub>6</sub>Si<sub>6</sub>U: C, 47.38; H, 7.80; N, 5.42. Found: C, 47.33; H, 7.59; N, 5.04. <sup>1</sup>H NMR (C<sub>6</sub>D<sub>6</sub>/THF-*d*<sub>8</sub>, 298 K, 500 MHz,  $\delta$  2.78 (br s, 12H, CH<sub>2</sub>), 2.59 (br s, 12H, CH<sub>2</sub>), 2.07 (t,  $J = 8.3$  Hz, 4H, *m*-CH), 1.86 (br s, 12H, CH<sub>2</sub>), -1.60 (br s, 54H, CH<sub>3</sub>), -1.74 (t,  $J = 8.3$  Hz, 2H, *p*-CH), -12.89 (d,  $J = 8.8$  Hz, 4H, *o*-CH). <sup>7</sup>Li{<sup>1</sup>H} NMR (C<sub>6</sub>D<sub>6</sub>/THF-*d*<sub>8</sub>, 25 °C, 155 MHz):  $\delta$  -1.59. IR (KBr pellet, cm<sup>-1</sup>): 2954 (m), 2887 (m), 2862 (w), 2050 (w, C <sub>$\alpha$</sub> -C <sub>$\beta$</sub>  stretch), 1911 (w, C <sub>$\beta$</sub> -C <sub>$\gamma$</sub>  stretch), 1514 (w), 1477 (m), 1385 (m), 1356 (s), 1263 (m), 1255 (s), 1136 (m), 1101 (s), 1088 (w), 933 (s), 862 (w), 841 (s), 894 (w), 694 (w).

**Synthesis of [Li(2.2.2-cryptand)][{(NR<sub>2</sub>)<sub>3</sub>Th(CCCPh<sub>2</sub>)] (4).** To a cold (-25 °C), dark brown Et<sub>2</sub>O solution (3 mL) of **2** (82.1 mg, 0.091 mmol) and 2.2.2-cryptand (29.0 mg, 0.091 mmol) was added dropwise a cold (-25 °C), colorless Et<sub>2</sub>O solution (0.5 mL) of LDA (9.7 mg, 0.091 mmol). Upon addition, the solution turned dark red-orange. After 2 min, the solution was concentrated *in vacuo* to 0.5 mL and filtered through a Celite column supported on glass wool (0.5 cm × 2 cm) into a 4 mL scintillation vial. This vial was placed into a 20 mL scintillation vial and isoctane (2

mL) was added to the outer vial. Storage of this two-vial system at -25 °C for 48 h resulted in the deposition of dark orange blocks. Decanting off the supernatant, rinsing with pentane (2 mL), and drying *in vacuo* afforded **4** as an analytically pure dark orange solid (53.4 mg, 45.7 % yield). X-ray quality crystals of **4** were grown by dissolving 36 mg of this material into THF:pentane (0.25:2.5 mL). Storage of this vial at -25 °C for 24 h resulted in the deposition of orange needles. Anal. Calcd for C<sub>51</sub>H<sub>100</sub>LiN<sub>5</sub>O<sub>6</sub>Si<sub>6</sub>Th: C, 47.60; H, 7.83; N, 5.44. Found: C, 47.30; H, 7.46; N, 5.14. <sup>1</sup>H NMR (C<sub>6</sub>D<sub>6</sub>/THF-*d*<sub>8</sub>, 298 K, 500 MHz): δ 7.85 (d, *J* = 8.3 Hz, 4H, *o*-CH), 7.09 (t, *J* = 7.7 Hz, 4H, *m*-CH), 6.45 (t, *J* = 7.0 Hz, 2H, *p*-CH), 3.08 (m, 12H, CH<sub>2</sub>), 3.03 (t, *J* = 5.0 Hz, 12H, CH<sub>2</sub>), 2.08 (t, *J* = 5.0 Hz, 12H, CH<sub>2</sub>), 0.53 (s, 54H, CH<sub>3</sub>). <sup>7</sup>Li{<sup>1</sup>H} NMR (C<sub>6</sub>D<sub>6</sub>/THF-*d*<sub>8</sub>, 25 °C, 155 MHz): δ -1.81. <sup>13</sup>C{<sup>1</sup>H} NMR (C<sub>6</sub>D<sub>6</sub>/THF-*d*<sub>8</sub>, 298 K, 126 MHz) δ: 205.40 (C<sub>α</sub>), 145.79 (C<sub>ipso</sub>), 128.49 (C<sub>β</sub>), 127.04 (C<sub>ortho</sub>), 122.53 (C<sub>meta</sub>), 114.29 (C<sub>para</sub>), 70.58 (C<sub>γ</sub>), 67.87 (C<sub>cryptand</sub>), 67.84 (C<sub>cryptand</sub>), 53.07 (C<sub>cryptand</sub>), 4.70 (CH<sub>3</sub>). UV-Vis/NIR (C<sub>6</sub>H<sub>6</sub>, 0.263 mM, 25 °C, L·mol<sup>-1</sup>·cm<sup>-1</sup>): 403 nm (ε = 8310) 537 nm (ε = 15,030). IR (KBr pellet, cm<sup>-1</sup>): 2954 (m), 2883 (m), 2816 (w), 2044 (m, C<sub>α</sub>-C<sub>β</sub> stretch), 1921 (s, C<sub>β</sub>-C<sub>γ</sub> stretch), 1585(w), 1479 (m), 1444 (w), 1356 (m), 1296 (w), 1250 (s), 1144 (w), 1115 (m), 1101 (s), 933 (s), 837 (s), 771 (m), 696 (w), 663 (w), 607 (w).

### Computational Details.

Kohn-Sham density functional calculations were employed for **1-4** with the Gaussian 16 package.<sup>11</sup> The crystal structure coordinates were optimized for hydrogen positions using the Perdew-Burke-Ernzerhof (PBE) exchange-correlation functional.<sup>12</sup> Small-core Stuttgart energy-consistent relativistic pseudopotentials, ECP60MWB for Th and U, were utilized with matching valence basis sets.<sup>13</sup> The 6-31G(d) basis set was used for the Si, C, N, and H atoms.<sup>14</sup> Atom-pairwise corrections for dispersion forces were considered via Grimme's D3 model augmented with the Becke-Johnson (BJ) damping.<sup>15</sup> To quantify the compositions of the chemical bonds of interest, natural localized molecular orbital (NLMO) analyses were carried out with the NBO program, version 6.0.<sup>16</sup> The quantum theory of atoms in molecules (QTAIM) analysis was performed with Multiwfn 3.6.<sup>17</sup>

NMR shielding constants ( $\sigma$ , ppm) for **2** and **4** were calculated with the NMR module of the ADF package (version 2017),<sup>18</sup> using the scalar relativistic and spin-orbit all electron Zeroth-Order Regular Approximation (ZORA) Hamiltonian,<sup>19</sup> in conjunction with all-electron doubly polarized triple- $\xi$  (TZ2P)<sup>20</sup> Slater-type basis set. The conductor-like screening model (COSMO) was used to describe solvent effect (tetrahydrofuran).<sup>21</sup> Functionals used for the NMR calculations were BP86, PBE, PBE0 (25% exact exchange), and PBE0 (40% exact exchange). The <sup>13</sup>C chemical shifts ( $\delta$ , ppm) were obtained by subtracting the C $_{\alpha}$ , C $_{\beta}$ , C $_{\gamma}$  nuclear magnetic shielding of interest from the reference compound (Tetramethylsilane, TMS), with the latter calculated at the same level of theory. The localized molecular orbital (LMO) analysis of the NMR shielding and the character of specific chemical bonds quantified on the basis of orbital localizations were described elsewhere.<sup>22, 23</sup> It helps to provide useful information on how spin-orbit coupling affects the chemical shifts. Note that the NLMOs produced from ECP60MWB valence basis set and Slater-type basis set (TZ2P) are qualitatively comparable to each other.



**Table S1.** % compositions of the An-C (An = Th, U) bonding NLMOs in **1-4**.

| Complex  | Orbital               | Total C $\alpha$ | 2s | 2p  | Total C $\beta$ | 2s | 2p  | Total An | 7s | 7p | 6d | 5f |
|----------|-----------------------|------------------|----|-----|-----------------|----|-----|----------|----|----|----|----|
| <b>1</b> | $\sigma(\text{U-C})$  | 75               | 31 | 69  | 4               | 0  | 100 | 16       | 12 | 1  | 69 | 18 |
|          | $\pi(\text{U-C})$     | 50               | 0  | 100 | 44              | 0  | 100 | 4        | 0  | 0  | 53 | 47 |
| <b>2</b> | $\sigma(\text{Th-C})$ | 77               | 30 | 70  | 5               | 0  | 100 | 14       | 13 | 1  | 73 | 13 |
|          | $\pi(\text{Th-C})$    | 50               | 0  | 100 | 44              | 0  | 100 | 4        | 0  | 0  | 53 | 47 |
| <b>3</b> | $\sigma(\text{U-C})$  | 78               | 47 | 53  | 0               | 0  | 0   | 20       | 16 | 1  | 67 | 16 |
|          | $\pi(\text{U-C})$     | 47               | 0  | 100 | 47              | 0  | 100 | 5        | 0  | 0  | 55 | 45 |
|          | $\pi(\text{U-C})$     | 31               | 0  | 100 | 28              | 0  | 100 | 11       | 0  | 0  | 32 | 68 |
| <b>4</b> | $\sigma(\text{Th-C})$ | 80               | 47 | 53  | 0               | 0  | 0   | 18       | 16 | 1  | 71 | 12 |
|          | $\pi(\text{Th-C})$    | 48               | 0  | 100 | 45              | 0  | 100 | 5        | 0  | 0  | 60 | 40 |
|          | $\pi(\text{Th-C})$    | 53               | 0  | 100 | 37              | 0  | 100 | 7        | 0  | 0  | 62 | 38 |

**Table S2.** The Wiberg Bond Orders for the selected bonds in **1-4** and  $[\text{An}(\text{C}\equiv\text{CH})(\text{NR}_2)_3]$  (An = U or Th) complexes.

| Complexes                                                  | An-C $\alpha$ | C $\alpha$ -C $\beta$ | C $\beta$ -C $\gamma$ |
|------------------------------------------------------------|---------------|-----------------------|-----------------------|
| <b>1</b>                                                   | 0.597         | 2.005                 | 1.638                 |
| <b>2</b>                                                   | 0.565         | 2.003                 | 1.634                 |
| <b>3</b>                                                   | 0.983         | 2.401                 | 1.281                 |
| <b>4</b>                                                   | 0.912         | 2.355                 | 1.305                 |
|                                                            |               |                       |                       |
| $[\text{U}(\text{C}\equiv\text{CH})(\text{NR}_2)_3]^{2+}$  | 0.709         |                       |                       |
| $[\text{Th}(\text{C}\equiv\text{CH})(\text{NR}_2)_3]^{2+}$ | 0.674         |                       |                       |

**Table S3.** Calculated carbon shielding ( $\sigma$ ) and chemical shift ( $\delta$ ) for TMS, Allene, Acetylene, and the  $C_\alpha$ ,  $C_\beta$ , and  $C_\gamma$  nuclei of **2** and **4** using various functionals.

| Complex               | Method                          | $\sigma_{\text{calc}}(\text{ppm})$           | $\delta_{\text{calc}}(\text{ppm})$           | $\Delta\sigma(\text{ppm})$ | $\delta_{\text{expt}}(\text{ppm})$ |
|-----------------------|---------------------------------|----------------------------------------------|----------------------------------------------|----------------------------|------------------------------------|
| TMS                   | PB86/SO-BP86                    | 186.9 / 187.8                                |                                              |                            |                                    |
|                       | PBE/SO-PBE                      | 187.5 / 188.4                                |                                              |                            |                                    |
|                       | PBE0/SO-PBE0 (25%) <sup>a</sup> | 192.2 / 193.0                                |                                              |                            |                                    |
|                       | PBE0/SO-PBE0 (40%)              | 194.7 / 195.5                                |                                              |                            |                                    |
| Allene                | PBE/SO-PBE                      | 107.9, -41.1, 107.9 /<br>108.5, -40.4, 108.5 | 79.6, 228.6, 79.6 /<br>79.9, 228.8, 79.9     | 0.3, 0.2, 0.3              |                                    |
|                       | MPW1PW91                        | 109, -41, 109 <sup>b</sup>                   |                                              |                            | 73.9, 208.5, 73.9 <sup>c</sup>     |
| Acetylene             | PBE/SO-PBE                      | 108.3 / 108.9                                | 79.2 / 79.5                                  | 0.3                        |                                    |
| <b>2</b> <sup>d</sup> | PB86/SO-BP86                    | 69.9, -23.4, 82.2 /<br>43.7, -26.2, 82.8     | 117.0, 210.3, 104.7 /<br>144.1, 214.0, 105.0 | 27.1, 3.7, 0.3             | 139.4, 204.7, 96.7                 |
|                       | PBE/SO-PBE                      | 70.4, -22.9, 82.8 /<br>44.5, -25.7, 83.4     | 117.1, 210.4, 104.7 /<br>143.9, 214.1, 105.0 | 26.8, 3.7, 0.3             |                                    |
|                       | PBE0/SO-PBE0 (25%)              | 75.3, -26.5, 88.7 /<br>46.2, -28.8, 89.1     | 116.9, 218.7, 103.6 /<br>146.8, 221.8, 103.9 | 29.9, 3.1, 0.3             |                                    |
|                       | PBE0/SO-PBE0 (40%)              | 78.5, -27.5, 91.8 /<br>47.2, -29.4, 92.0     | 116.2, 222.2, 102.9 /<br>148.3, 224.9, 103.5 | 32.1, 2.7, 0.6             |                                    |
| <b>4</b>              | PB86/SO-BP86                    | 12.3, 59.3, 104.3 /<br>-23.2, 51.2, 105.2    | 174.6, 127.6, 82.6 /<br>211.0, 136.6, 82.0   | 36.4, 9.0, 0.0             | 205.4, 128.5, 70.6                 |
|                       | PBE/SO-PBE                      | 12.6, 59.6, 104.8 /<br>-22.7, 51.4, 105.8    | 174.9, 127.9, 82.7 /<br>211.1, 137.0, 82.6   | 36.2, 9.1, -0.1            |                                    |
|                       | PBE0/SO-PBE0 (25%)              | 19.4, 62.8, 115.1 /<br>-19.3, 55.1, 115.5    | 172.8, 129.4, 77.1 /<br>212.3, 137.9, 77.5   | 39.5, 8.5, 0.4             |                                    |
|                       | PBE0/SO-PBE0 (40%)              | 23.7, 65.0, 120.4 /<br>-16.8, 57.4, 120.6    | 171.0, 129.7, 74.3 /<br>212.3, 138.1, 74.9   | 41.3, 8.4, 0.6             |                                    |

<sup>a</sup> Fraction of exact exchange in the functional in parentheses.

<sup>b</sup> Values taken from Ref 25.

<sup>c</sup> Values taken from Ref 26.

<sup>d</sup> The shielding and chemical shifts are averaged from two experimental geometries.

**Table S4.** QTAIM analysis of the complexes **3** and **4**.

| Complex  | BCP <sup>a</sup>            | $\rho(r)$ <sup>b</sup> | $\nabla^2\rho(r)$ <sup>c</sup> | $H(r)$ <sup>d</sup> | $\varepsilon(r)$ <sup>e</sup> |
|----------|-----------------------------|------------------------|--------------------------------|---------------------|-------------------------------|
| <b>3</b> | U-C $_{\alpha}$             | 0.102                  | 0.147                          | -0.038              | 0.300                         |
|          | C $_{\alpha}$ -C $_{\beta}$ | 0.399                  | 0.939                          | -0.693              | 0.026                         |
|          | C $_{\beta}$ -C $_{\gamma}$ | 0.295                  | 0.751                          | -0.293              | 0.201                         |
| <b>4</b> | Th-C $_{\alpha}$            | 0.093                  | 0.116                          | -0.033              | 0.193                         |
|          | C $_{\alpha}$ -C $_{\beta}$ | 0.388                  | 0.958                          | -0.662              | 0.012                         |
|          | C $_{\beta}$ -C $_{\gamma}$ | 0.292                  | 0.739                          | -0.293              | 0.229                         |

<sup>a</sup> The bond critical points.<sup>b</sup> The electron density ( $\rho(r)$ , au).<sup>c</sup> Laplacian of electron density ( $\nabla^2\rho(r)$ , au).<sup>d</sup> Total electronic energy density ( $H(r)$ , au).<sup>e</sup> Ellipticity of electron density ( $\varepsilon(r)$ , au).**Table S5.** Localized Molecular Orbital(LMO) Analysis of NMR Shielding for allene.

| LMO type                                | SR/<br>C $_{\alpha}$ (L+NL) | SOC/<br>C $_{\alpha}$ (L+NL) | SR/<br>C $_{\beta}$ (L+NL) | SOC/<br>C $_{\beta}$ (L+NL) | SR/<br>C $_{\gamma}$ (L+NL) | SOC/<br>C $_{\gamma}$ (L+NL) |
|-----------------------------------------|-----------------------------|------------------------------|----------------------------|-----------------------------|-----------------------------|------------------------------|
| $\sigma$ (C $_{\alpha}$ -C $_{\beta}$ ) | -57.9                       | -57.9                        | -77.1                      | -77.1                       | -6.3                        | -6.3                         |
| $\pi$ (C $_{\alpha}$ -C $_{\beta}$ )    | 32.2                        | 32.2                         | -40.7                      | -40.8                       | 2.0                         | 2.0                          |
| $\sigma$ (C $_{\alpha}$ -H $_1$ )       | -32.1                       | -32.1                        | -2.0                       | -2.0                        | -0.6                        | -0.5                         |
| $\sigma$ (C $_{\alpha}$ -H $_2$ )       | -32.1                       | -32.1                        | -2.0                       | -2.0                        | -0.6                        | -0.5                         |
| $\sigma$ (C $_{\beta}$ -C $_{\gamma}$ ) | -6.3                        | -6.3                         | -77.1                      | -77.1                       | -57.9                       | -57.9                        |
| $\pi$ (C $_{\beta}$ -C $_{\gamma}$ )    | 2.0                         | 2.0                          | -40.7                      | -40.7                       | 32.2                        | 32.2                         |
| C $_{\alpha}$ (core)                    | 203.4                       | 204.1                        | -0.6                       | -0.6                        | -0.1                        | -0.1                         |
| C $_{\beta}$ (core)                     | -0.1                        | -0.1                         | 203.6                      | 204.4                       | -0.1                        | -0.1                         |
| C $_{\gamma}$ (core)                    | -0.1                        | -0.1                         | -0.6                       | -0.6                        | 203.4                       | 204.1                        |
| $\sigma$ (C $_{\alpha}$ -H $_3$ )       | -0.6                        | -0.5                         | -2.0                       | -2.0                        | -32.1                       | -32.1                        |
| $\sigma$ (C $_{\alpha}$ -H $_4$ )       | -0.6                        | -0.5                         | -2.0                       | -2.0                        | -32.1                       | -32.1                        |
| $\Sigma$ other                          | 0.0                         | -0.2                         | 0.0                        | 0.1                         | 0.0                         | -0.2                         |
| <b>Total calc.</b>                      | <b>107.9</b>                | <b>108.5</b>                 | <b>-41.1</b>               | <b>-40.4</b>                | <b>107.9</b>                | <b>108.5</b>                 |

**Table S6.** Localized Molecular Orbital(LMO) Analysis of NMR Shielding for complex **2**.

| LMO type                                    | SR/<br>C $_{\alpha}$ (L+NL) | SOC/<br>C $_{\alpha}$ (L+NL) | $\Delta^{SO}/$<br>C $_{\alpha}$ | SR/<br>C $_{\beta}$ (L+NL) | SOC/<br>C $_{\beta}$ (L+NL) | $\Delta^{SO}/$<br>C $_{\beta}$ | SR/<br>C $_{\gamma}$ (L+NL) | SOC/<br>C $_{\gamma}$ (L+NL) | $\Delta^{SO}/$<br>C $_{\gamma}$ |
|---------------------------------------------|-----------------------------|------------------------------|---------------------------------|----------------------------|-----------------------------|--------------------------------|-----------------------------|------------------------------|---------------------------------|
| $\sigma(C_{\alpha}-C_{\beta})$              | -49.2                       | -48.3                        | 0.9                             | -85.8                      | -86.3                       | -0.5                           | -6.0                        | -6.0                         | 0.0                             |
| $\pi(C_{\alpha}-C_{\beta})/$<br>$\pi(Th-C)$ | 26.3                        | 26.4                         | 0.1                             | -15.7                      | -15.8                       | -0.1                           | 1.6                         | 1.6                          | 0.0                             |
| $\sigma(C_{\alpha}-H)$                      | -48.1                       | -46.9                        | 1.2                             | -4.2                       | -4.1                        | 0.1                            | 0.4                         | 0.4                          | 0.0                             |
| $\sigma(C_{\beta}-C_{\gamma})$              | -6.6                        | -6.6                         | 0.0                             | -89.6                      | -89.7                       | -0.1                           | -37.3                       | -37.3                        | 0.0                             |
| $\pi(C_{\beta}-C_{\gamma})$                 | 0.2                         | 0.2                          | 0.0                             | -29.9                      | -29.8                       | 0.1                            | 5.6                         | 5.5                          | -0.1                            |
| $\sigma(C_{\gamma}-C_{ipso1})$              | -0.3                        | -0.3                         | 0.0                             | 1.0                        | 1.1                         | 0.1                            | -38.1                       | -38.1                        | 0.0                             |
| $\sigma(C_{\gamma}-C_{ipso2})$              | -0.3                        | -0.3                         | 0.0                             | 0.5                        | 0.5                         | 0.0                            | -35.4                       | -35.4                        | 0.0                             |
| C $_{\alpha}$ (core)                        | 203.6                       | 189.5                        | -14.1                           | -0.5                       | -0.5                        | 0.0                            | -0.1                        | -0.1                         | 0.0                             |
| C $_{\beta}$ (core)                         | -0.3                        | -0.3                         | 0.0                             | 203.7                      | 203.1                       | -0.6                           | 0.0                         | 0.0                          | 0.0                             |
| C $_{\gamma}$ (core)                        | -0.2                        | -0.2                         | 0.0                             | -1.0                       | -1.0                        | 0.0                            | 203.3                       | 204.0                        | 0.7                             |
| $\sigma(Th-C_{\alpha})$                     | -50.1                       | -61.0                        | -10.9                           | 2.7                        | 1.5                         | -1.2                           | 2.0                         | 2.0                          | 0.0                             |
| Th(core)                                    | -1.9                        | -3.9                         | -2.0                            | -0.4                       | -0.3                        | 0.1                            | -0.1                        | -0.1                         | 0.0                             |
| $\Sigma$ other                              | -3.1                        | -3.5                         | -0.4                            | -5.4                       | -6.1                        | -0.7                           | -13.1                       | -13.1                        | 0.0                             |
| <b>Total calc.</b>                          | <b>70.0</b>                 | <b>44.8</b>                  | <b>-25.2</b>                    | <b>-24.6</b>               | <b>-27.4</b>                | <b>-2.8</b>                    | <b>82.8</b>                 | <b>83.4</b>                  | <b>0.6</b>                      |

**Table S7.** Localized Molecular Orbital(LMO) Analysis of NMR Shielding for complex **4**

| LMO type                              | SR/<br>C $_{\alpha}$ (L+NL) | SOC/<br>C $_{\alpha}$ (L+NL) | $\Delta^{SO}/$<br>C $_{\alpha}$ | SR/<br>C $_{\beta}$ (L+NL) | SOC/<br>C $_{\beta}$ (L+NL) | $\Delta^{SO}/$<br>C $_{\beta}$ | SR/<br>C $_{\gamma}$ (L+NL) | SOC/<br>C $_{\gamma}$ (L+NL) | $\Delta^{SO}/$<br>C $_{\gamma}$ |
|---------------------------------------|-----------------------------|------------------------------|---------------------------------|----------------------------|-----------------------------|--------------------------------|-----------------------------|------------------------------|---------------------------------|
| $\sigma(C_{\alpha}-C_{\beta})$        | -69.2                       | -68.0                        | 1.2                             | -68.5                      | -69.1                       | -0.6                           | -2.6                        | -2.7                         | -0.1                            |
| $\pi(C_{\alpha}-C_{\beta})$           | -2.2                        | -1.8                         | 0.4                             | 13.4                       | 13.0                        | -0.4                           | 1.7                         | 1.7                          | 0.0                             |
| $\pi(C_{\alpha}-C_{\beta})$           | -12.5                       | -12.3                        | 0.2                             | 37.6                       | 37.5                        | -0.1                           | -0.4                        | -0.5                         | -0.1                            |
| $\sigma(C_{\beta}-C_{\gamma})$        | -7.7                        | -8.0                         | -0.3                            | -72.1                      | -72.6                       | -0.5                           | -26.5                       | -26.4                        | 0.1                             |
| $\sigma(C_{\gamma}-C_{\text{ipso1}})$ | -1.0                        | -1.0                         | 0.0                             | 0.5                        | 0.5                         | 0.0                            | -37.7                       | -37.8                        | -0.1                            |
| $\sigma(C_{\gamma}-C_{\text{ipso2}})$ | -0.9                        | -0.9                         | 0.0                             | 0.1                        | 0.0                         | -0.1                           | -37.6                       | -37.8                        | -0.2                            |
| C $_{\alpha}$ (core)                  | 203.7                       | 183.4                        | -20.3                           | -0.5                       | -0.4                        | 0.1                            | -0.1                        | -0.1                         | 0.0                             |
| C $_{\beta}$ (core)                   | -0.7                        | -0.6                         | 0.0                             | 203.6                      | 201.1                       | -2.5                           | 0.2                         | 0.2                          | 0.0                             |
| C $_{\gamma}$ (core)                  | -0.2                        | -0.2                         | 0.0                             | -0.7                       | -0.7                        | 0.0                            | 203.3                       | 204.1                        | 0.8                             |
| $\sigma(\text{Th}-C_{\alpha})$        | -81.4                       | -95.2                        | -13.8                           | -12.9                      | -15.9                       | -3.0                           | 2.0                         | 2.0                          | 0.0                             |
| C $_{\gamma}$ LP                      | -7.6                        | -7.6                         | 0.0                             | -27.9                      | -28.1                       | -0.2                           | 17.9                        | 18.2                         | 0.3                             |
| Th(core)                              | -4.5                        | -6.9                         | -2.4                            | -1.2                       | -1.6                        | -0.4                           | -0.3                        | -0.2                         | 0.1                             |
| $\Sigma$ other                        | -3.2                        | -3.6                         | -0.4                            | -11.8                      | -12.3                       | -0.5                           | -15.1                       | -14.9                        | 0.2                             |
| <b>Total calc.</b>                    | <b>12.6</b>                 | <b>-22.7</b>                 | <b>-35.3</b>                    | <b>59.6</b>                | <b>51.4</b>                 | <b>-8.2</b>                    | <b>104.8</b>                | <b>105.8</b>                 | <b>1.0</b>                      |

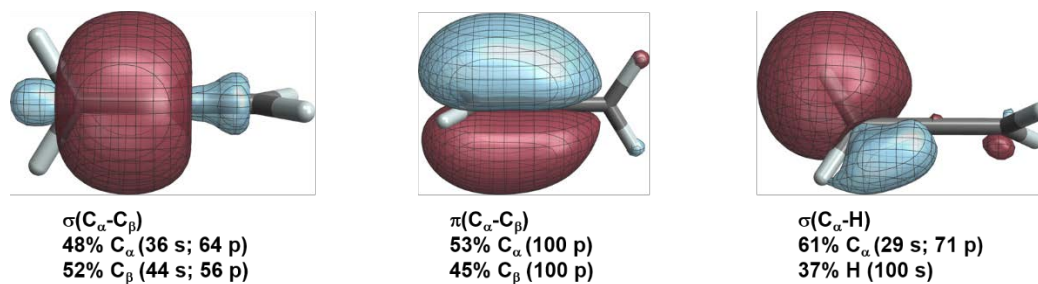

**Figure S1.** Isosurfaces ( $\pm 0.03$  a.u.) of representative bonding NLMOs in allene.

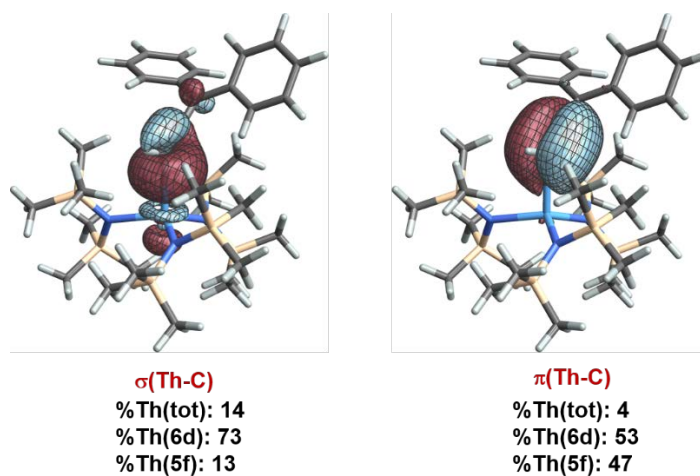

**Figure S2.** Isosurfaces ( $\pm 0.03$  a.u.) of two bonding NLMOs in complex **2**, along with weight-% metal and ligand character and 6d vs. 5f contributions at the metal.

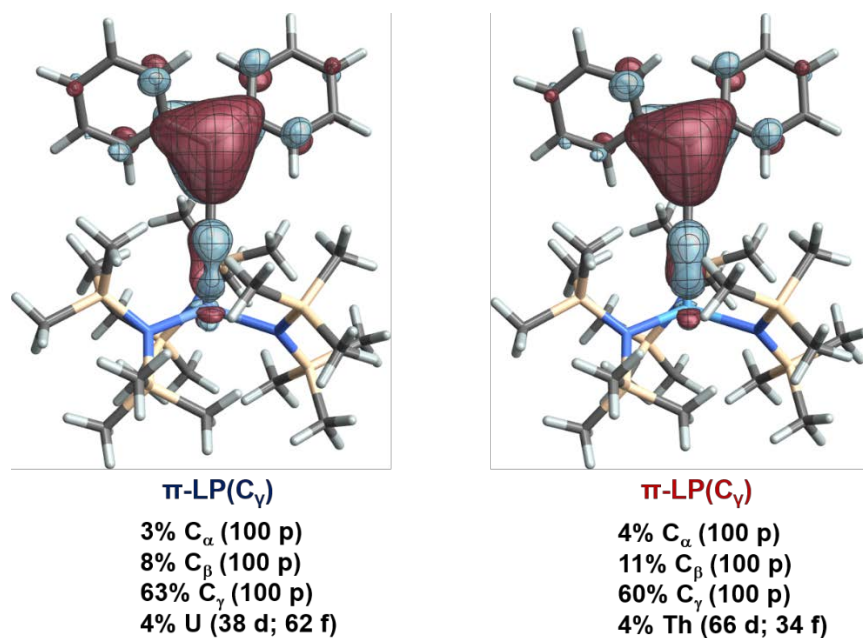

**Figure S3.** Isosurfaces ( $\pm 0.03$  a.u.) of representative  $\pi$ -LP( $C_\gamma$ ) bonding NLMO in **3** (left) and **4** (right) along with weight-% metal and ligand character and 6d vs. 5f contributions at the metal.

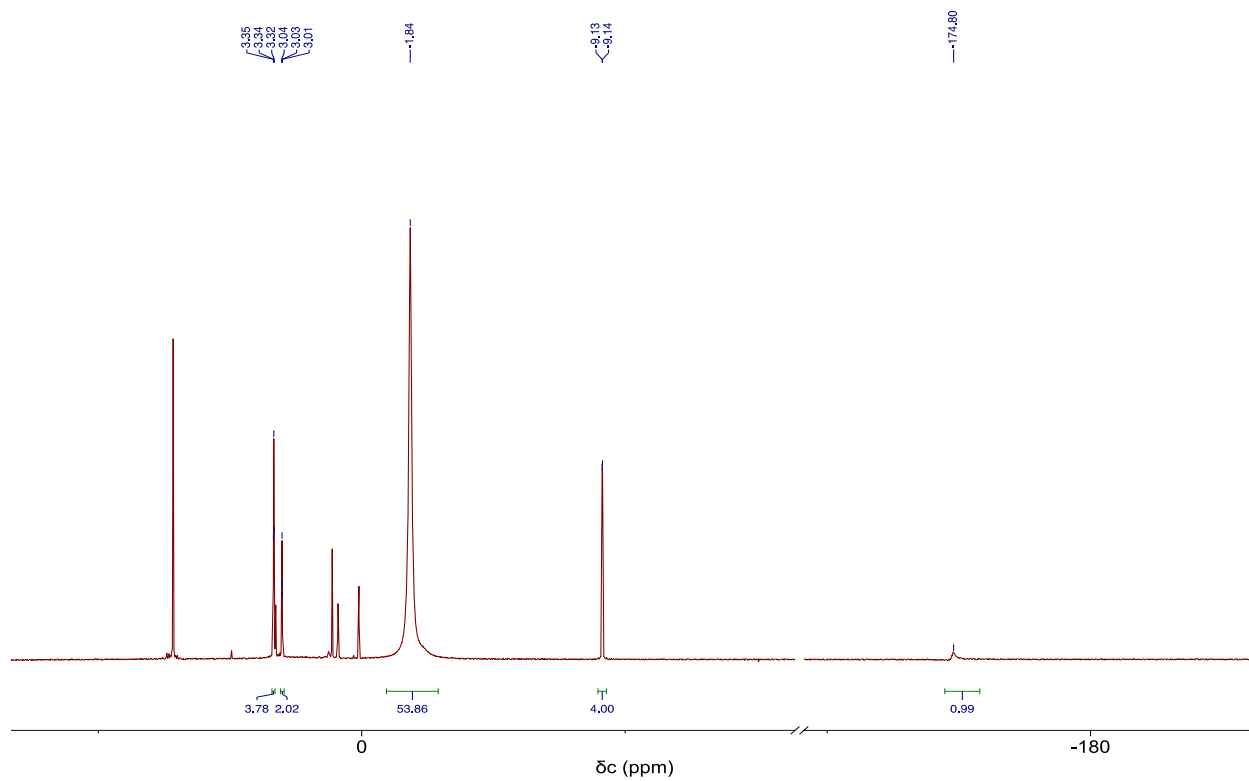

**Figure S4.**  $^1\text{H}$  NMR spectrum of  $[\{(\text{NR}_2)_3\}\text{U}(\text{CH}=\text{C}=\text{CPh}_2)]$  (**1**) in a 10:1 mixture of  $\text{C}_6\text{D}_6$  and  $\text{THF-}d_8$  at room temperature.



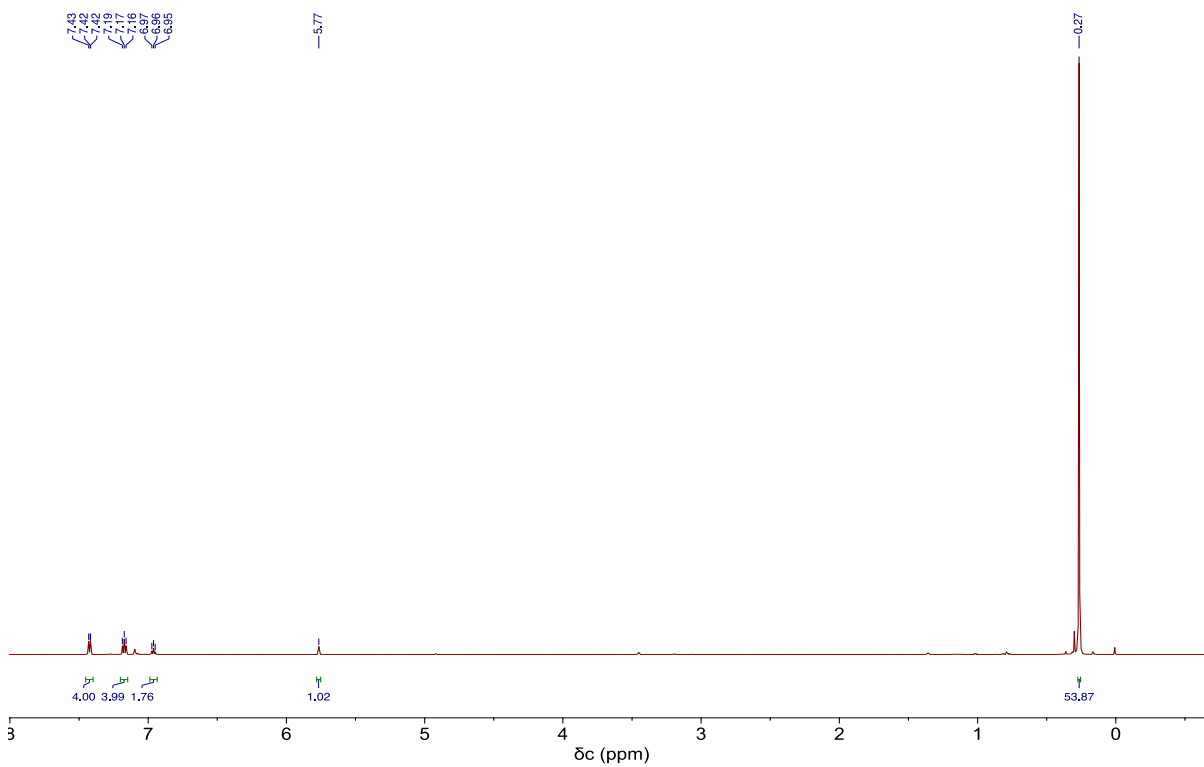

**Figure S5.**  $^1\text{H}$  NMR spectrum of  $[\{(\text{NR}_2)_3\}\text{Th}(\text{CH}=\text{C}=\text{CPh}_2)]$  (**2**) in a 10:1 mixture of  $\text{C}_6\text{D}_6$  and  $\text{THF-}d_8$  at room temperature.

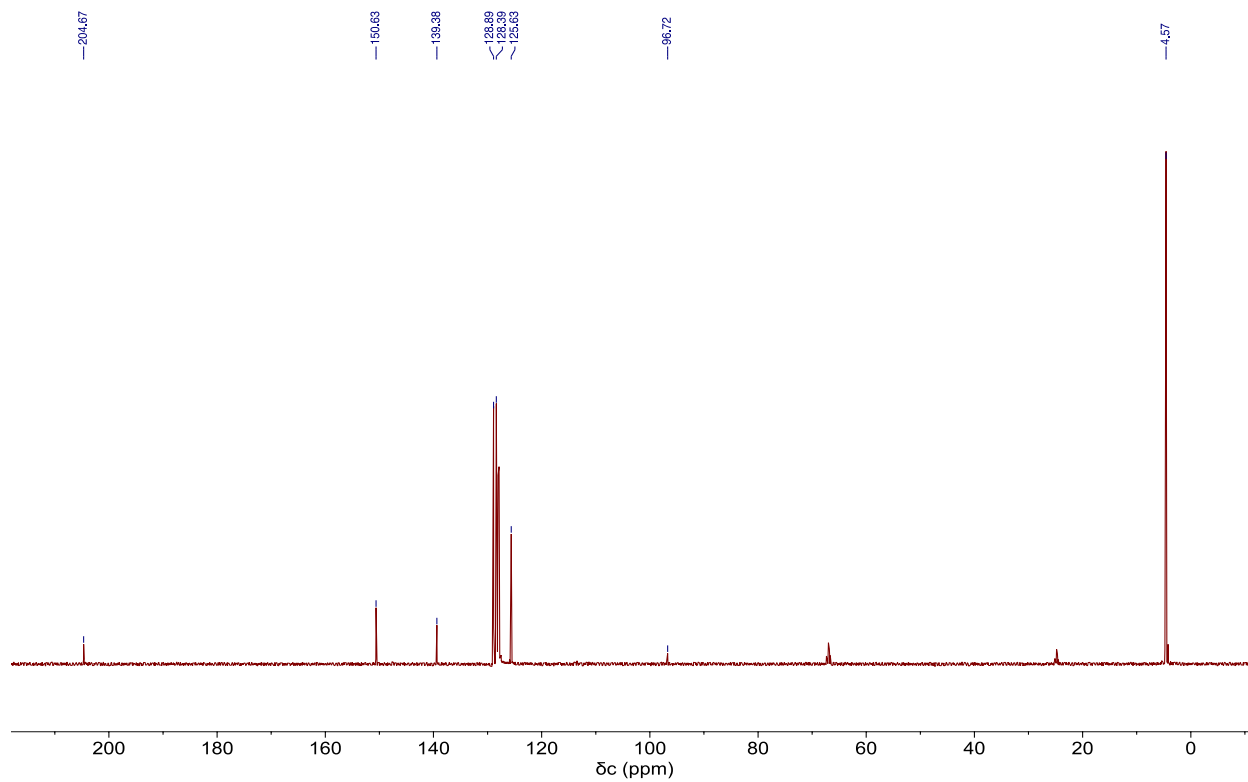

**Figure S6.**  $^{13}\text{C}\{^1\text{H}\}$  NMR spectrum of  $[\{(\text{NR}_2)_3\}\text{Th}(\text{CH}=\text{C}=\text{CPh}_2)]$  (**2**) in a 10:1 mixture of  $\text{C}_6\text{D}_6$  and  $\text{THF-}d_8$  at room temperature.

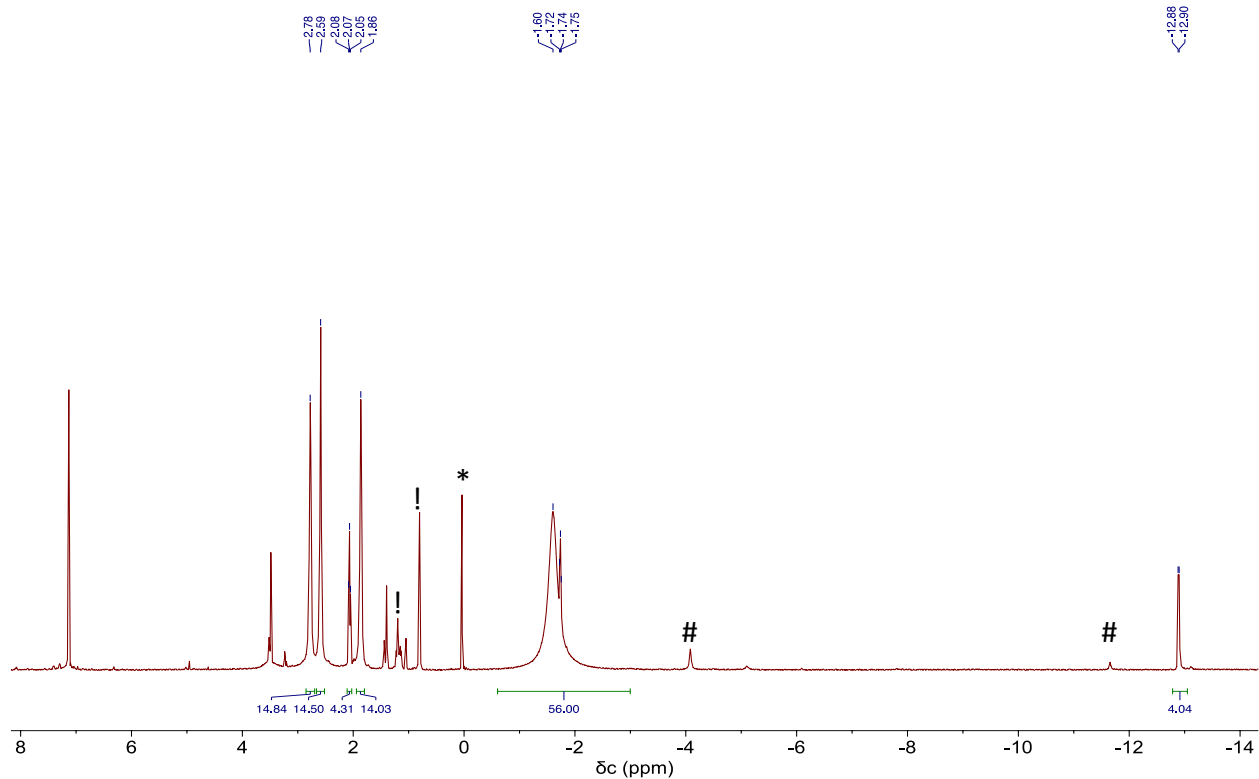

**Figure S7.**  $^1\text{H}$  NMR spectrum of  $[\text{Li}(2.2.2\text{-Cryptand})][\{(\text{NR}_2)_3\}\text{U}(\text{CCCPh}_2)]$  (**3**) in a 10:1 mixture of  $\text{C}_6\text{D}_6$  and  $\text{THF-}d_8$  at room temperature. (\*) indicates free  $\text{HN}(\text{SiMe}_3)_2$ , (#) indicates an unidentified impurity. (!) indicates pentane.

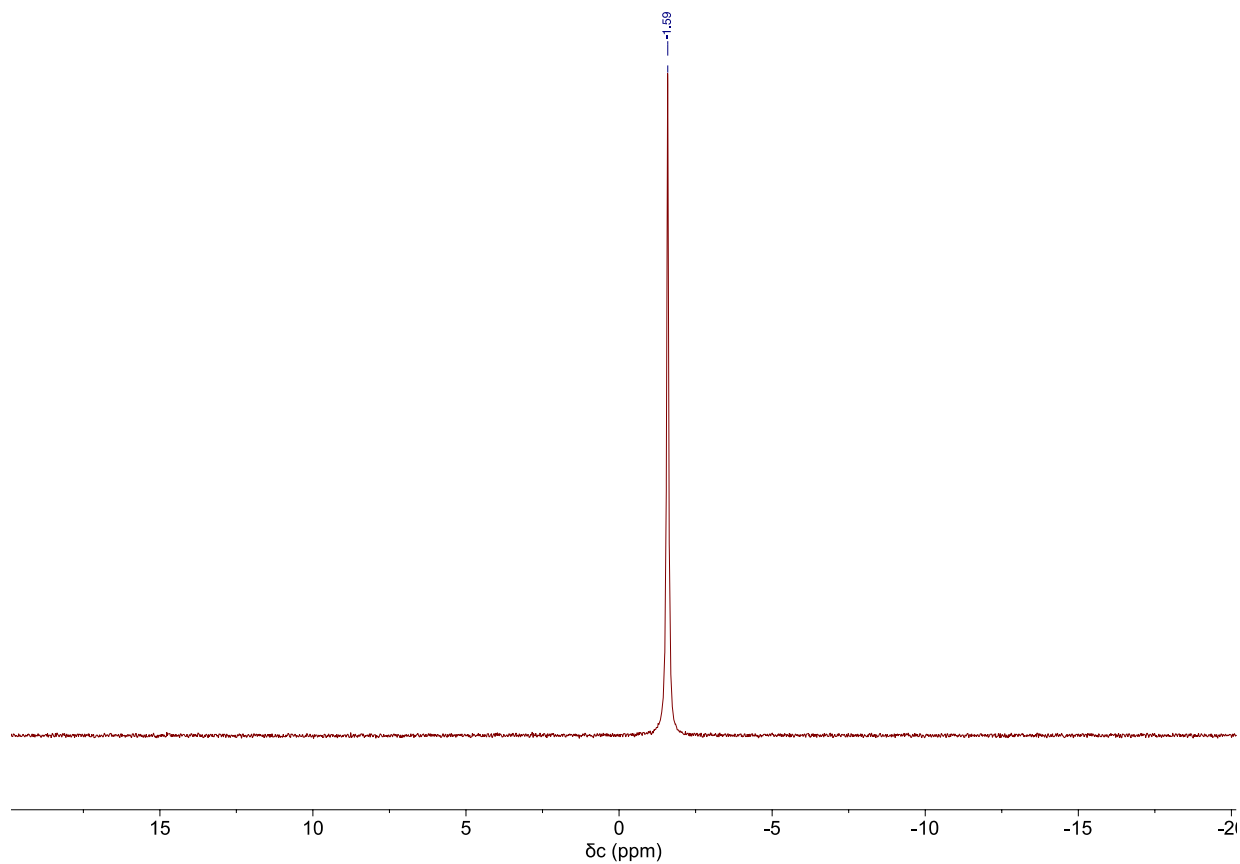

**Figure S8.**  ${}^7\text{Li}\{{}^1\text{H}\}$  NMR spectrum of  $[\text{Li}(2.2.2\text{-Cryptand})][\{(\text{NR}_2)_3\}\text{U}(\text{CCCPh}_2)]$  (**3**) in a 10:1 mixture of  $\text{C}_6\text{D}_6$  and  $\text{THF-}d_8$  at room temperature.

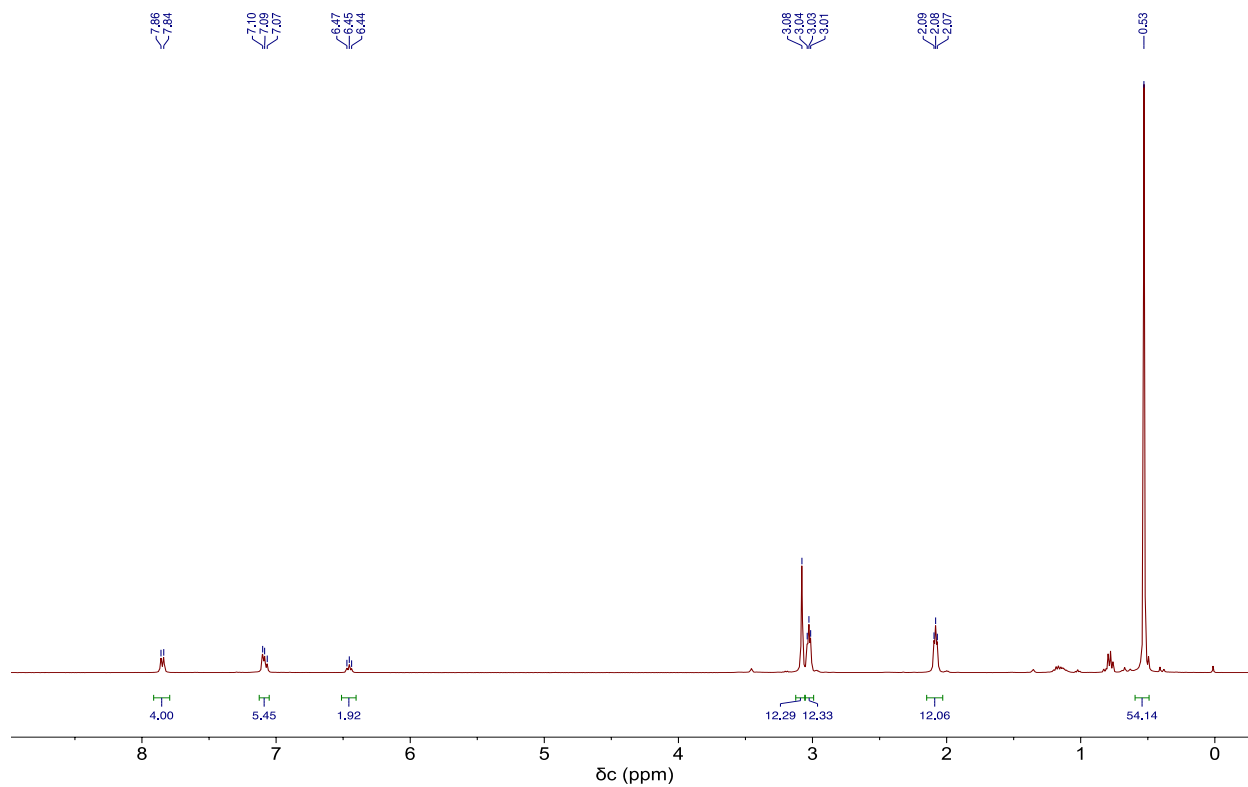

**Figure S9.**  $^1\text{H}$  NMR spectrum of  $[\text{Li}(2.2.2\text{-Cryptand})][\{(\text{NR}_2)_3\}\text{Th}(\text{CCCPh}_2)]$  (**4**) in a 10:1 mixture of  $\text{C}_6\text{D}_6$  and  $\text{THF-}d_8$  at room temperature.

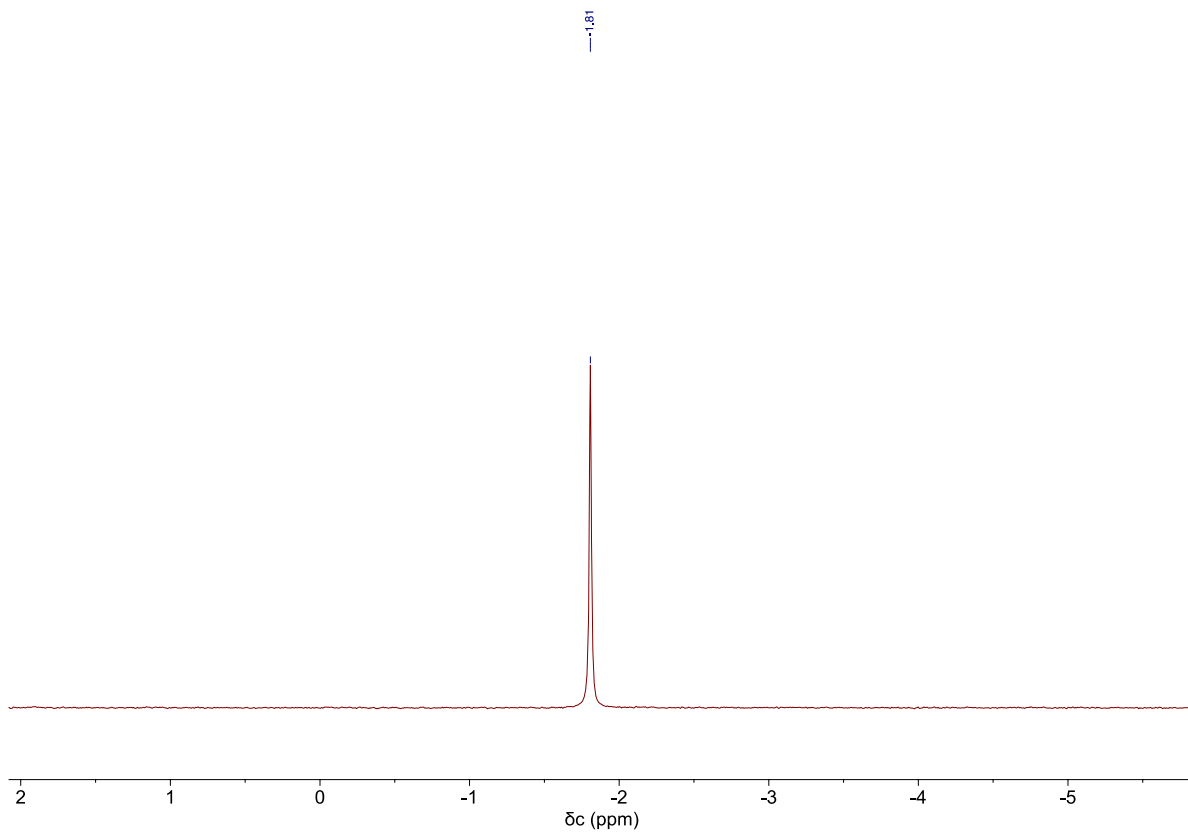

**Figure S10.**  ${}^7\text{Li}\{^1\text{H}\}$  NMR spectrum of  $[\text{Li}(2.2.2\text{-Cryptand})][\{(\text{NR}_2)_3\}\text{Th}(\text{CCCPh}_2)]$  (**4**) in a 10:1 mixture of  $\text{C}_6\text{D}_6$  and  $\text{THF-}d_8$  at room temperature.

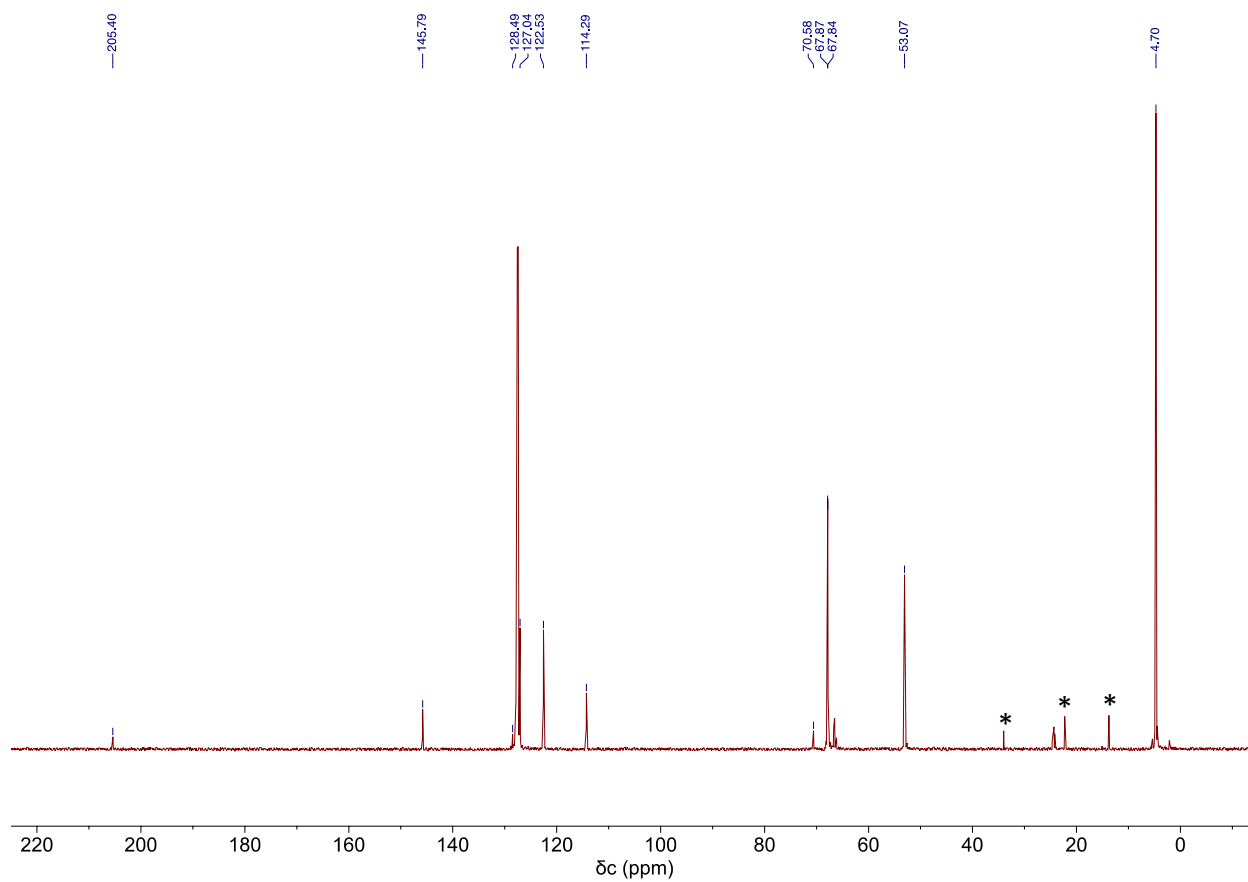

**Figure S11.**  $^{13}\text{C}\{^1\text{H}\}$  NMR spectrum of  $[\text{Li}(2.2.2\text{-Cryptand})][\{(\text{NR}_2)_3\}\text{Th}(\text{CCCPh}_2)]$  (**4**) in a 10:1 mixture of  $\text{C}_6\text{D}_6$  and  $\text{THF-}d_8$  at room temperature. (\*) indicates pentane.

**Table S8.** X-ray Crystallographic Data for Complexes **1**, **2**, **3**·C<sub>5</sub>H<sub>12</sub>, and **4**·C<sub>5</sub>H<sub>12</sub>

|                                                                 | <b>1</b>                                                         | <b>2</b>                                                          | <b>3</b> ·C <sub>5</sub> H <sub>12</sub>                                           | <b>4</b> ·C <sub>5</sub> H <sub>12</sub>                                            |
|-----------------------------------------------------------------|------------------------------------------------------------------|-------------------------------------------------------------------|------------------------------------------------------------------------------------|-------------------------------------------------------------------------------------|
| empirical formula                                               | C <sub>33</sub> H <sub>65</sub> N <sub>3</sub> Si <sub>6</sub> U | C <sub>33</sub> H <sub>65</sub> N <sub>3</sub> Si <sub>6</sub> Th | C <sub>56</sub> H <sub>112</sub> LiN <sub>5</sub> O <sub>6</sub> Si <sub>6</sub> U | C <sub>56</sub> H <sub>112</sub> LiN <sub>5</sub> O <sub>6</sub> Si <sub>6</sub> Th |
| Crystal habit, color                                            | Block, Brown                                                     | Block, Colorless                                                  | Needle, Dark-purple                                                                | Needle, Orange                                                                      |
| crystal size (mm)                                               | 0.30 × 0.20 × 0.10                                               | 0.30 × 0.20 × 0.10                                                | 0.40 × 0.10 × 0.05                                                                 | 0.40 × 0.10 × 0.05                                                                  |
| crystal system                                                  | Triclinic                                                        | Triclinic                                                         | Monoclinic                                                                         | Monoclinic                                                                          |
| space group                                                     | P-1                                                              | P-1                                                               | P2 <sub>1</sub>                                                                    | P2 <sub>1</sub>                                                                     |
| vol (Å <sup>3</sup> )                                           | 2162.2(9)                                                        | 4339.3(18)                                                        | 3449.1(13)                                                                         | 3520.1(16)                                                                          |
| a (Å)                                                           | 11.486(3)                                                        | 11.816(3)                                                         | 12.471(3)                                                                          | 12.595(3)                                                                           |
| b (Å)                                                           | 11.561(3)                                                        | 19.383(5)                                                         | 10.829(2)                                                                          | 10.892(3)                                                                           |
| c (Å)                                                           | 18.978(5)                                                        | 19.538(5)                                                         | 25.657(6)                                                                          | 25.756(7)                                                                           |
| α (deg)                                                         | 77.340(4)                                                        | 97.533(3)                                                         | 90.00                                                                              | 90.00                                                                               |
| β (deg)                                                         | 80.647(4)                                                        | 101.555(3)                                                        | 95.484(3)                                                                          | 94.977(4)                                                                           |
| γ (deg)                                                         | 61.820(4)                                                        | 91.603(3)                                                         | 90.00                                                                              | 90.00                                                                               |
| Z                                                               | 2                                                                | 4                                                                 | 2                                                                                  | 2                                                                                   |
| fw (g/mol)                                                      | 910.45                                                           | 904.46                                                            | 1365.01                                                                            | 1359.02                                                                             |
| density (calcd)<br>(Mg/m <sup>3</sup> )                         | 1.398                                                            | 1.384                                                             | 1.314                                                                              | 1.282                                                                               |
| abs coeff (mm <sup>-1</sup> )                                   | 3.944                                                            | 3.626                                                             | 2.503                                                                              | 2.265                                                                               |
| F <sub>000</sub>                                                | 920                                                              | 1832                                                              | 1420                                                                               | 1416                                                                                |
| Total no. reflections                                           | 23271                                                            | 43276                                                             | 36346                                                                              | 28848                                                                               |
| Unique reflections                                              | 9281                                                             | 18382                                                             | 14410                                                                              | 14458                                                                               |
| R <sub>int</sub>                                                | 0.0399                                                           | 0.0376                                                            | 0.0343                                                                             | 0.0444                                                                              |
| final R indices [ <i>I</i> ><br>2σ( <i>I</i> )]                 | R <sub>1</sub> = 0.0237<br>wR <sub>2</sub> = 0.0556              | R <sub>1</sub> = 0.0381<br>wR <sub>2</sub> = 0.0810               | R <sub>1</sub> = 0.0404,<br>wR <sub>2</sub> = 0.1001                               | R <sub>1</sub> = 0.0623,<br>wR <sub>2</sub> = 0.1615                                |
| largest diff peak and<br>hole (e <sup>-</sup> Å <sup>-3</sup> ) | 1.235 and -0.448                                                 | 6.071 and -1.692                                                  | 1.180 and -0.840                                                                   | 1.859 and -1.978                                                                    |
| GOF                                                             | 1.149                                                            | 1.005                                                             | 1.012                                                                              | 1.049                                                                               |



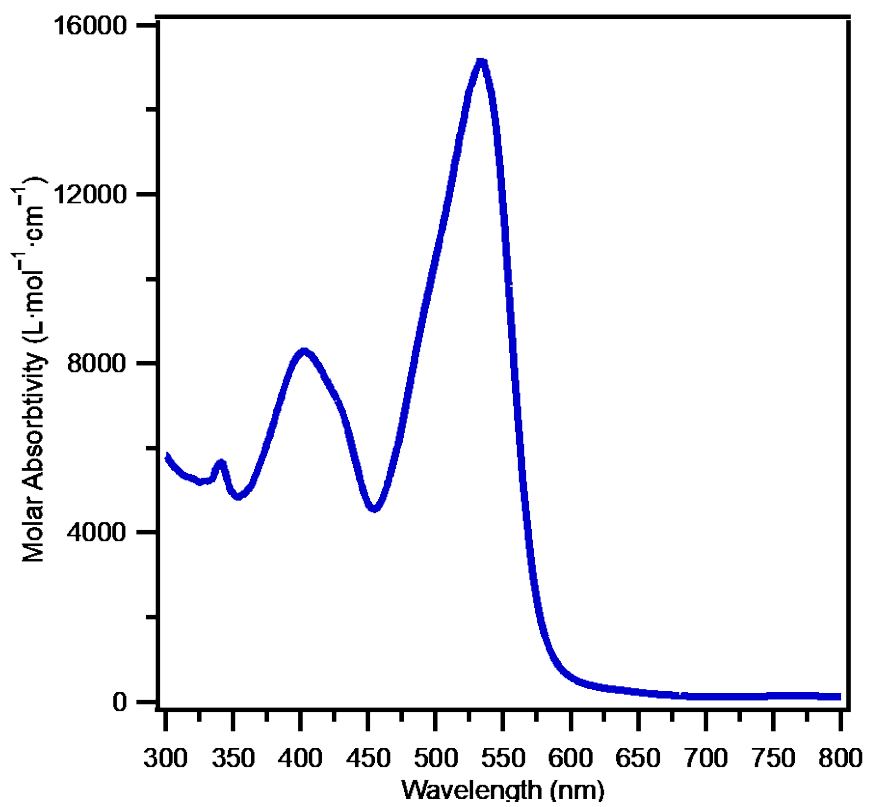

**Figure S12.** UV-Vis spectra of **4** (0.263 mM) in C<sub>6</sub>H<sub>6</sub>.

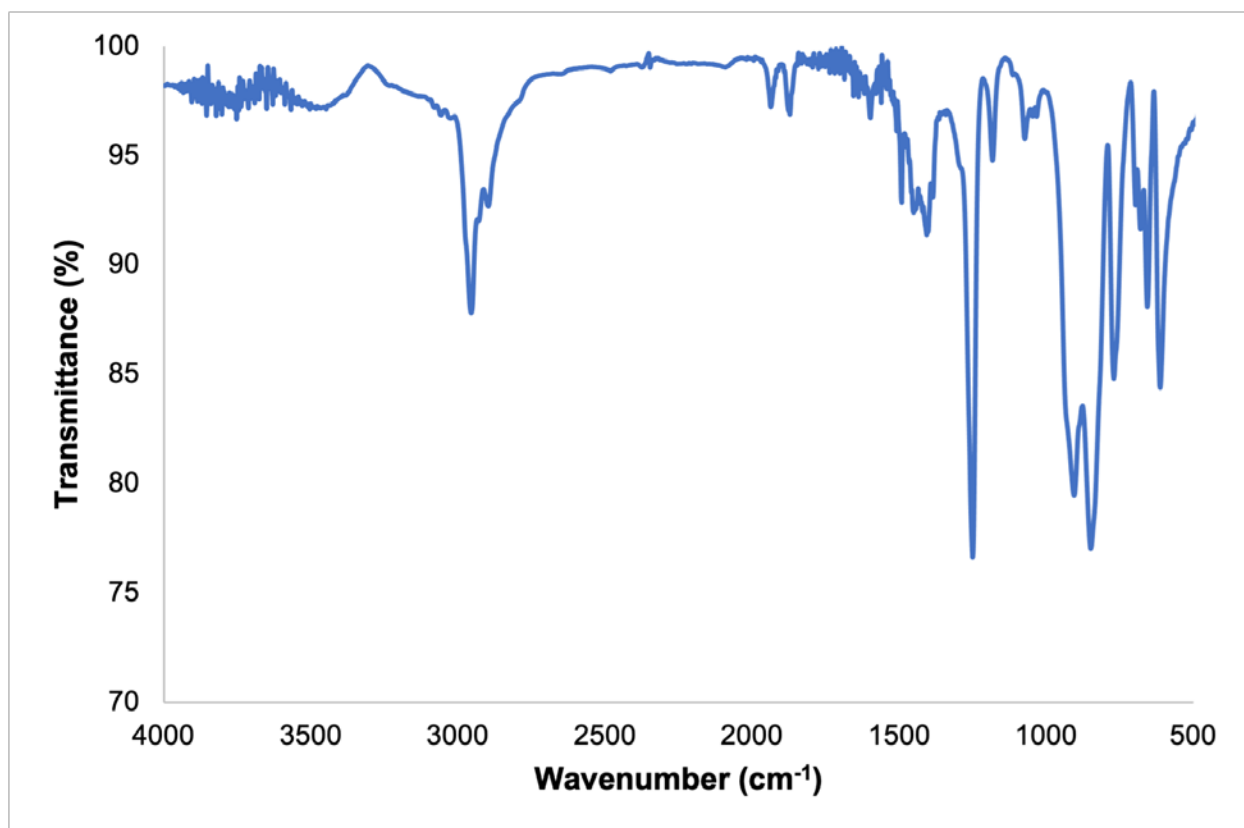

**Figure S13.** IR spectrum of **1** (KBr Pellet).

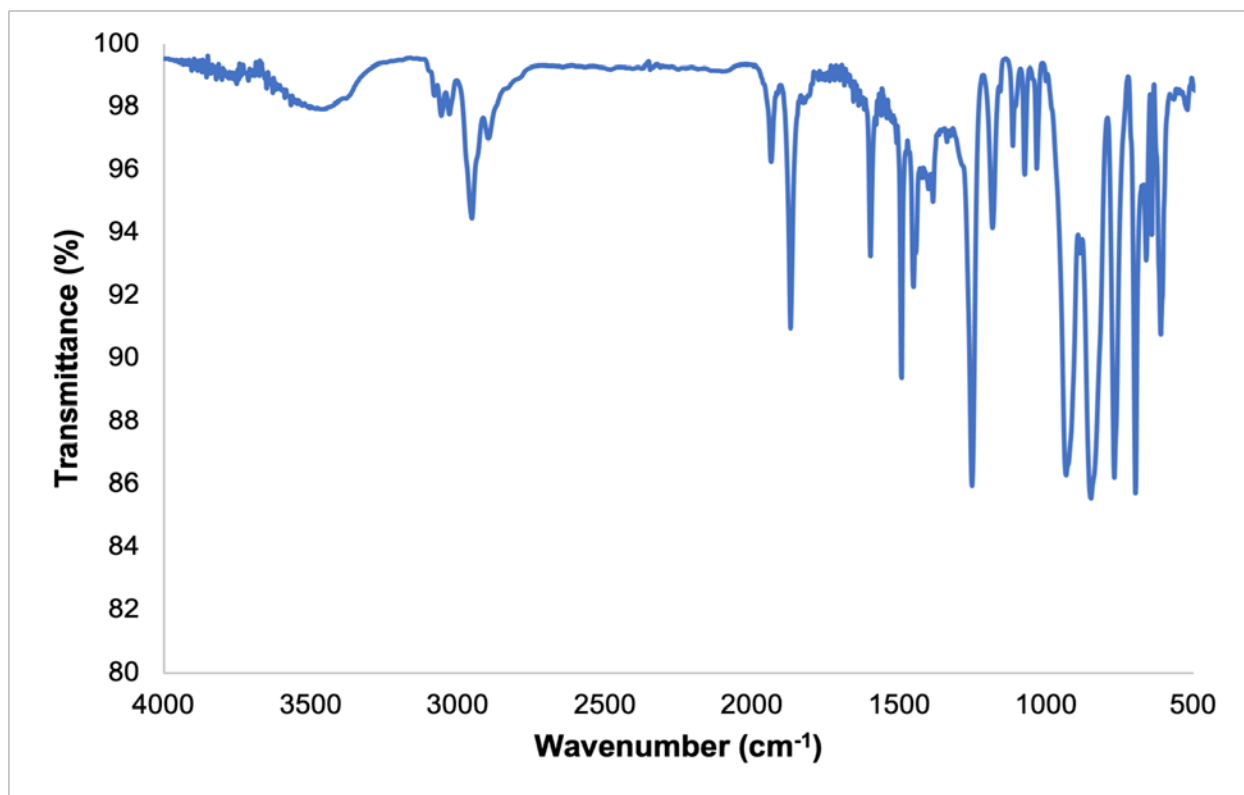

**Figure S14.** IR spectrum of **2** (KBr Pellet).

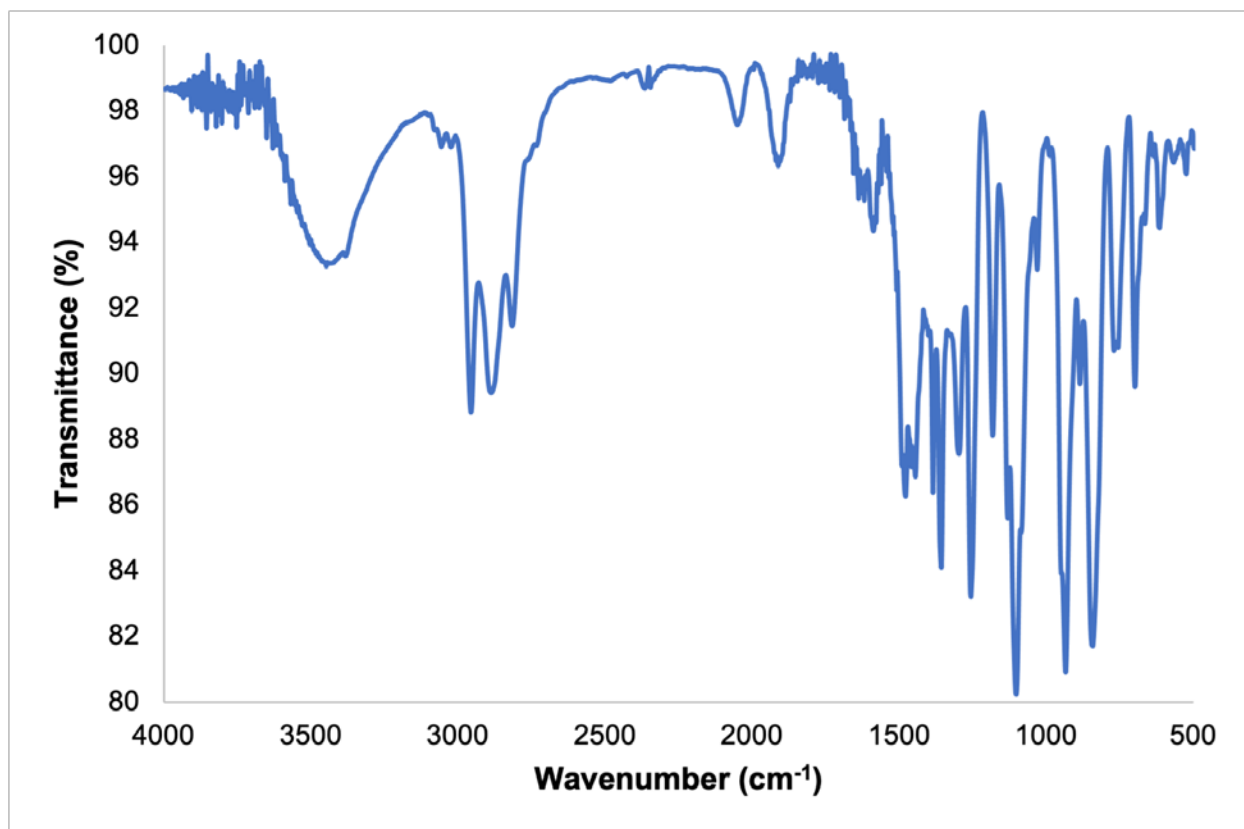

**Figure S15.** IR spectrum of **3** (KBr Pellet).

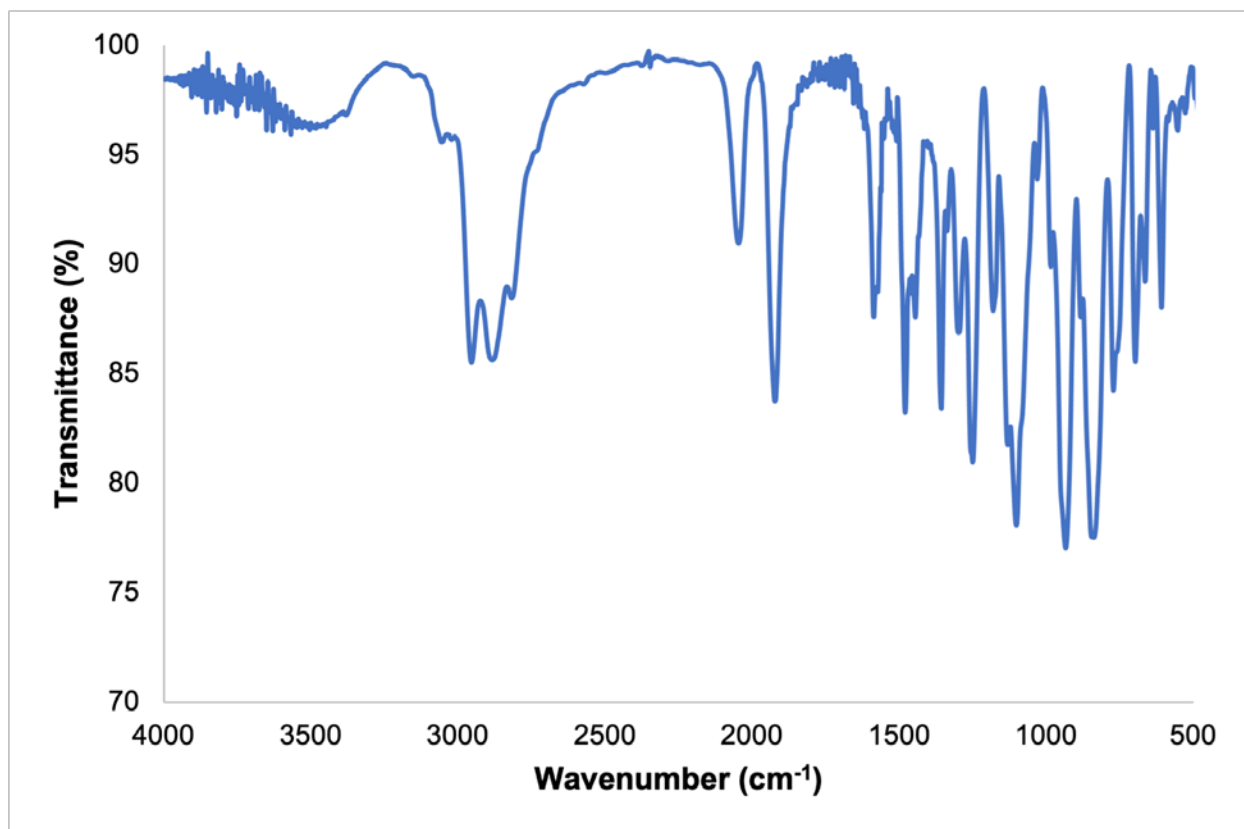

**Figure S16.** IR spectrum of **4** (KBr Pellet).

**Cartesian Coordinates (unit: angstrom)****Compound 1**

|    |             |             |             |
|----|-------------|-------------|-------------|
| U  | 0.00000000  | 0.00000000  | 2.45728744  |
| C  | 0.00000000  | 0.00000000  | 0.00000000  |
| C  | -0.94729212 | 0.00067491  | -0.88888076 |
| C  | -1.95677151 | 0.06762573  | -1.75096813 |
| H  | 1.02426414  | 0.16068345  | -0.39023598 |
| Si | -2.82509481 | 0.15671689  | 4.58269330  |
| Si | -2.71430029 | -1.95642368 | 2.40080172  |
| Si | 2.98538026  | -1.44081347 | 1.62519121  |
| Si | -0.40475195 | 3.24212554  | 1.72209668  |
| Si | 1.75985096  | -2.50481724 | 4.17161513  |
| Si | 1.71589791  | 2.79481333  | 3.82169218  |
| N  | 0.49052334  | 2.15684460  | 2.75974148  |
| N  | 1.71581054  | -1.38471360 | 2.83812883  |
| N  | -2.00027299 | -0.62229209 | 3.26078731  |
| C  | -2.56752014 | 1.40934869  | -1.96568001 |
| C  | -2.08026338 | 2.48355952  | 1.37372565  |
| H  | -2.11579304 | 1.42540474  | 1.06042029  |
| H  | -2.55519099 | 3.04070184  | 0.54604652  |
| H  | -2.72636459 | 2.58934850  | 2.26168686  |
| C  | -2.43508037 | -1.11470577 | -2.48923794 |
| C  | 3.33918261  | 0.29048778  | 1.00376177  |
| H  | 2.49027627  | 0.99681958  | 1.01130930  |
| H  | 3.72160710  | 0.26198790  | -0.03309476 |
| H  | 4.12416456  | 0.75180852  | 1.63019883  |
| C  | -2.03530220 | -2.40012237 | -2.12702212 |
| H  | -1.39242741 | -2.53202451 | -1.25101770 |
| C  | -1.76935733 | 1.53744290  | 5.25309688  |
| H  | -0.80235067 | 1.16891141  | 5.64524638  |
| H  | -2.29282407 | 2.01047625  | 6.10461440  |
| H  | -1.54114254 | 2.32752142  | 4.52074412  |
| C  | -1.77315451 | 2.51657278  | -2.19145762 |
| H  | -0.69081763 | 2.37639652  | -2.27806421 |
| C  | 0.55281603  | 3.60523784  | 0.16627748  |
| H  | 1.51264874  | 4.09794777  | 0.39892100  |
| H  | -0.01584752 | 4.27225849  | -0.50477735 |
| H  | 0.77565188  | 2.68056529  | -0.39138182 |
| C  | -1.31640753 | -2.90522036 | 1.57815470  |
| H  | -0.62454100 | -2.32048210 | 0.94319080  |
| H  | -1.77121675 | -3.64845830 | 0.89715101  |
| H  | -0.71382762 | -3.46225850 | 2.31389789  |
| C  | -3.25098740 | -0.99523853 | -3.62721754 |
| H  | -3.56920293 | 0.00021310  | -3.95285072 |
| C  | -3.95291715 | 1.59459313  | -1.87666510 |
| H  | -4.59608557 | 0.72726170  | -1.69086882 |
| C  | 0.20234388  | -2.33110030 | 5.18419256  |
| H  | 0.07521232  | -1.31452805 | 5.60295492  |

|   |             |             |             |
|---|-------------|-------------|-------------|
| H | 0.27156810  | -3.01519930 | 6.05073808  |
| H | -0.72390382 | -2.57447587 | 4.64241451  |
| C | 2.48803602  | -2.57864208 | 0.22830948  |
| H | 2.28701104  | -3.59354518 | 0.61472475  |
| H | 3.28752350  | -2.66272364 | -0.53036329 |
| H | 1.57336669  | -2.23495734 | -0.28462171 |
| C | -2.31432090 | 3.78884653  | -2.28267941 |
| H | -1.66265876 | 4.65262403  | -2.45378579 |
| C | -3.92813474 | -1.40024259 | 1.10769340  |
| H | -4.80565966 | -0.90373646 | 1.55708189  |
| H | -4.29169448 | -2.25498148 | 0.50903209  |
| H | -3.46540072 | -0.68674451 | 0.40360400  |
| C | 3.16084666  | -2.22253832 | 5.37524480  |
| H | 4.15086118  | -2.47144366 | 4.96072712  |
| H | 3.00673678  | -2.86572685 | 6.26151517  |
| H | 3.20081992  | -1.17832754 | 5.72861181  |
| C | -4.46254843 | 0.83628179  | 4.03636968  |
| H | -4.38108223 | 1.45813650  | 3.12897007  |
| H | -4.91993457 | 1.45485338  | 4.83014422  |
| H | -5.17632924 | 0.02358891  | 3.80971282  |
| C | 4.62740980  | -2.06730481 | 2.26868528  |
| H | 5.02531928  | -1.44082211 | 3.08545566  |
| H | 5.35916065  | -2.02775638 | 1.44009729  |
| H | 4.59779448  | -3.11093637 | 2.62365078  |
| C | -3.68519343 | 3.94804101  | -2.18890048 |
| H | -4.12527156 | 4.94877154  | -2.27094113 |
| C | -3.15083806 | -0.94915158 | 6.06675983  |
| H | -3.89021711 | -1.74192798 | 5.86976634  |
| H | -3.54690577 | -0.32712108 | 6.89080442  |
| H | -2.23090202 | -1.43591180 | 6.43306660  |
| C | -2.42539641 | -3.50566026 | -2.86758913 |
| H | -2.09043584 | -4.50202781 | -2.55593366 |
| C | -3.58103389 | -3.20027713 | 3.50482898  |
| H | -2.95100769 | -3.54010272 | 4.34478319  |
| H | -3.84726338 | -4.09038876 | 2.90541594  |
| H | -4.51973956 | -2.80219502 | 3.92769347  |
| C | -4.49784225 | 2.85648371  | -1.98797656 |
| H | -5.58304770 | 2.98672076  | -1.90718200 |
| C | 1.85828587  | -4.26883245 | 3.61189385  |
| H | 1.03567190  | -4.54400907 | 2.92916459  |
| H | 1.80413573  | -4.94783468 | 4.48274410  |
| H | 2.80234736  | -4.49550317 | 3.08596531  |
| C | -3.63088117 | -2.10375856 | -4.36170143 |
| H | -4.25823506 | -1.96723999 | -5.25001864 |
| C | 2.58021061  | 1.39450121  | 4.70686267  |
| H | 1.87934792  | 0.81109029  | 5.33371500  |
| H | 3.34318691  | 1.81144089  | 5.38972790  |
| H | 3.08261011  | 0.68249029  | 4.03295292  |
| C | 1.06252693  | 3.88958065  | 5.19563166  |

|   |             |             |             |
|---|-------------|-------------|-------------|
| H | 0.66011241  | 4.85196700  | 4.84221492  |
| H | 1.89528168  | 4.11708616  | 5.88706582  |
| H | 0.27288666  | 3.39382708  | 5.78495068  |
| C | -0.79374027 | 4.88568811  | 2.51495717  |
| H | -1.32247392 | 4.77963891  | 3.47796298  |
| H | -1.45755546 | 5.45246547  | 1.83573161  |
| H | 0.10138324  | 5.50815646  | 2.68603009  |
| C | 2.98801907  | 3.78531176  | 2.89543571  |
| H | 3.43663362  | 3.21426373  | 2.06397580  |
| H | 3.80702950  | 4.08763901  | 3.57354232  |
| H | 2.56299679  | 4.71145130  | 2.46968655  |
| C | -3.21793336 | -3.36055309 | -3.98870166 |
| H | -3.51732002 | -4.23969060 | -4.57022724 |

Compound 2

|    |             |             |             |
|----|-------------|-------------|-------------|
| Th | 0.00000000  | 0.00000000  | 2.52835735  |
| C  | -0.00000000 | 0.00000000  | 0.00000000  |
| C  | 0.33030625  | -0.90060817 | -0.86551977 |
| C  | 0.65710632  | -1.89596474 | -1.67909978 |
| H  | -0.29854831 | 0.81636964  | -0.38607021 |
| Si | -2.86057349 | -0.45218505 | 4.52234631  |
| Si | 0.70867323  | -3.30941995 | 2.56062547  |
| Si | 2.42048980  | -1.78122193 | 4.53812057  |
| Si | -3.30971938 | 0.75964206  | 1.76194118  |
| Si | 0.54263407  | 3.39981979  | 3.68123742  |
| Si | 2.49226541  | 2.20289657  | 1.75913413  |
| N  | -2.25159540 | 0.14807475  | 3.00596917  |
| N  | 1.15640247  | -1.81785636 | 3.33882169  |
| N  | 1.05341604  | 2.03186860  | 2.73395043  |
| C  | -0.95432542 | -3.02752350 | 1.71767757  |
| H  | -1.62496795 | -2.78474761 | 2.38869919  |
| H  | -1.23248623 | -3.84964639 | 1.25991897  |
| H  | -0.87106751 | -2.30196577 | 1.06199327  |
| C  | -0.06848652 | -4.28769173 | -2.02626431 |
| H  | 0.83388168  | -4.56577657 | -1.92150451 |
| C  | -2.51699642 | 2.28396900  | 0.98208319  |
| H  | -2.73742707 | 3.07627035  | 1.51500044  |
| H  | -2.85676432 | 2.39947782  | 0.06860113  |
| H  | -1.54322261 | 2.16879292  | 0.95499284  |
| C  | -3.60889123 | -0.54588670 | 0.46013008  |
| H  | -2.75786701 | -0.78862363 | 0.03992047  |
| H  | -4.22121558 | -0.19355631 | -0.21920377 |
| H  | -4.00622030 | -1.33749246 | 0.87776442  |
| C  | -0.38665030 | -2.92456686 | -1.96151019 |
| C  | 1.92610462  | -3.83189236 | 1.25074403  |
| H  | 2.08195801  | -3.08606806 | 0.63498981  |
| H  | 1.56519126  | -4.59529887 | 0.75472508  |
| H  | 2.77174184  | -4.08756966 | 1.67490135  |
| C  | -1.72554120 | -2.56067474 | -2.09139695 |



|   |             |             |             |
|---|-------------|-------------|-------------|
| H | -1.96574828 | -1.64298339 | -2.04264368 |
| C | 3.26908009  | 0.50497175  | 1.49498703  |
| H | 3.80635609  | 0.26773207  | 2.27963515  |
| H | 3.84170648  | 0.52790277  | 0.70011269  |
| H | 2.56207577  | -0.16074312 | 1.36925778  |
| C | -3.85605290 | 0.75770371  | 5.54266347  |
| H | -3.38959363 | 1.61905963  | 5.57704608  |
| H | -3.96269327 | 0.40683336  | 6.45118482  |
| H | -4.73892625 | 0.88133689  | 5.13361372  |
| C | -1.06132874 | -5.23607877 | -2.23923435 |
| H | -0.82583806 | -6.15532824 | -2.29665410 |
| C | -4.97068850 | 1.32563426  | 2.39646913  |
| H | -5.42033487 | 0.57945704  | 2.84495989  |
| H | -5.51974317 | 1.63399216  | 1.64496860  |
| H | -4.84398079 | 2.06247004  | 3.03059225  |
| C | -2.71902583 | -3.51712807 | -2.29053000 |
| H | -3.62761007 | -3.25026189 | -2.37249194 |
| C | 0.48073313  | -4.73447486 | 3.74393242  |
| H | 1.34732790  | -4.97684695 | 4.13428306  |
| H | 0.11092438  | -5.50251265 | 3.26357500  |
| H | -0.13468825 | -4.46873339 | 4.45886255  |
| C | 2.01054481  | -2.69918666 | 6.12811578  |
| H | 1.22673755  | -2.28821115 | 6.54937703  |
| H | 2.77346789  | -2.65058290 | 6.74147907  |
| H | 1.81686831  | -3.63736283 | 5.92430363  |
| C | -1.15686632 | 3.14007374  | 4.39635850  |
| H | -1.78169717 | 2.90507060  | 3.67966866  |
| H | -1.45754182 | 3.96624460  | 4.83232916  |
| H | -1.12674041 | 2.41647658  | 5.05570426  |
| C | 2.27002039  | -2.73542561 | -3.42133797 |
| H | 1.57440745  | -3.25517428 | -3.80716904 |
| C | -3.92379910 | -1.97361141 | 4.31420218  |
| H | -4.62950008 | -1.79258930 | 3.65907750  |
| H | -4.32962596 | -2.20872345 | 5.17435308  |
| H | -3.37012823 | -2.71977849 | 4.00155822  |
| C | 2.00395922  | -1.96685595 | -2.30499840 |
| C | -2.38195736 | -4.86634829 | -2.36742018 |
| H | -3.05476476 | -5.52262174 | -2.50673361 |
| C | -1.35684294 | -0.86733448 | 5.57155492  |
| H | -0.91187935 | -1.66027916 | 5.20596692  |
| H | -1.64033943 | -1.04557186 | 6.49125300  |
| H | -0.73402124 | -0.11089686 | 5.56204275  |
| C | 2.67020145  | -0.01503601 | 5.11643615  |
| H | 2.87506924  | 0.55425114  | 4.34736164  |
| H | 3.41440829  | 0.01738373  | 5.75349184  |
| H | 1.85322894  | 0.30507555  | 5.55167729  |
| C | 4.02339323  | -2.49487489 | 3.88792911  |
| H | 3.94030400  | -3.46721973 | 3.81494803  |
| H | 4.75268152  | -2.27436787 | 4.50361758  |

|   |             |             |             |
|---|-------------|-------------|-------------|
| H | 4.21466489  | -2.11489240 | 3.00478431  |
| C | 2.12357493  | 2.95434866  | 0.09734273  |
| H | 1.50066811  | 2.37596663  | -0.39176485 |
| H | 2.95528444  | 3.04404859  | -0.41230883 |
| H | 1.71918479  | 3.83856561  | 0.22201949  |
| C | 3.85387771  | 3.23790945  | 2.55305061  |
| H | 3.52409913  | 4.14720299  | 2.70937921  |
| H | 4.63000084  | 3.27177507  | 1.95524370  |
| H | 4.11653018  | 2.83475730  | 3.40641100  |
| C | 4.55307971  | -1.99311263 | -3.47093952 |
| H | 5.41594674  | -2.00647024 | -3.87025753 |
| C | 1.63424551  | 3.71774425  | 5.15687276  |
| H | 1.61015465  | 2.94181216  | 5.75488813  |
| H | 1.31249844  | 4.50857549  | 5.63668416  |
| H | 2.55427080  | 3.86860156  | 4.85610389  |
| C | 0.51130861  | 4.95880086  | 2.64646575  |
| H | 1.39203626  | 5.10005241  | 2.24195120  |
| H | 0.28658545  | 5.72427749  | 3.21550043  |
| H | -0.16320617 | 4.86817682  | 1.94175434  |
| C | 3.54072349  | -2.76360940 | -3.98979919 |
| H | 3.70814618  | -3.31760178 | -4.74182438 |
| C | 3.05526995  | -1.19211357 | -1.79890515 |
| H | 2.89746578  | -0.64394023 | -1.03925612 |
| C | 4.31246232  | -1.20035965 | -2.36828177 |
| H | 5.00705301  | -0.66217783 | -2.00368071 |

### Compound 3

|    |             |             |             |
|----|-------------|-------------|-------------|
| U  | 0.00000000  | -0.00000000 | 2.30439631  |
| C  | 0.00000000  | 0.00000000  | 0.00000000  |
| C  | -0.14324712 | -0.00330987 | -1.21315422 |
| C  | -0.31355157 | 0.07081719  | -2.60142708 |
| N  | 1.13438998  | 1.91204657  | 2.81585501  |
| N  | -2.23811023 | -0.02828677 | 2.57235230  |
| N  | 1.07098940  | -1.93540012 | 2.78572272  |
| Si | 2.24652247  | 2.00469045  | 4.14723090  |
| Si | -3.17024394 | -0.87511506 | 1.38358011  |
| Si | -2.98361537 | 0.88693483  | 3.84624440  |
| Si | 2.47428142  | -2.29162844 | 1.81353584  |
| Si | 0.53307491  | -3.05827448 | 3.98899166  |
| Si | 0.89012387  | 3.26275611  | 1.77725536  |
| C  | -0.39557568 | 1.41596947  | -3.18213318 |
| C  | -0.01752273 | 1.73170013  | -4.49966215 |
| C  | -4.14937998 | 2.20164830  | 3.20499468  |
| C  | -0.81371582 | 2.47917738  | -2.39510652 |
| C  | 2.39842186  | 0.34702011  | 4.97036445  |
| C  | -0.07303125 | 3.05407262  | -4.97032265 |
| C  | -0.85954361 | 3.75856532  | -2.88984745 |
| C  | -0.88908280 | -1.25669935 | -4.67590301 |
| C  | -1.02144849 | -2.40974010 | 4.78823714  |

|   |             |             |             |
|---|-------------|-------------|-------------|
| C | -0.33990500 | -1.14785778 | -3.37397410 |
| C | 0.16741715  | -3.55172031 | -3.55853544 |
| C | -0.38213334 | -3.54645178 | -4.83541062 |
| C | 1.72489958  | 3.16292012  | 5.51033657  |
| C | -0.89197396 | 3.31203271  | 1.23862575  |
| C | -3.93098344 | -0.13927019 | 5.11676656  |
| C | -2.25434031 | -2.36174274 | 0.79880036  |
| C | 2.00318812  | -3.42767126 | 0.37904505  |
| C | 1.22922885  | 4.91984279  | 2.59627494  |
| C | -4.80850701 | -1.51882956 | 2.07060465  |
| C | -0.87922778 | -2.43934589 | -5.37438416 |
| C | 0.13483212  | -2.36174824 | -2.82780178 |
| C | -1.63914831 | 1.75260343  | 4.83068874  |
| C | -3.61119466 | 0.21354544  | -0.07195947 |
| C | 1.72221662  | -3.32772205 | 5.38284498  |
| C | -0.46478155 | 4.04483726  | -4.17394929 |
| C | 3.88338055  | -3.10194484 | 2.75623719  |
| C | 3.18468092  | -0.70928394 | 1.14103349  |
| C | 0.15956461  | -4.74348810 | 3.26009938  |
| C | 3.93515815  | 2.53187229  | 3.58755972  |
| C | 1.94930740  | 3.15611137  | 0.25562551  |
| H | 0.36648446  | 0.94717647  | -5.15772414 |
| H | -3.64489262 | 2.85716451  | 2.47454497  |
| H | -4.53486463 | 2.83645590  | 4.02440848  |
| H | -5.02147109 | 1.75590866  | 2.69337074  |
| H | -1.12398506 | 2.28200715  | -1.36594100 |
| H | 1.44175654  | 0.02299888  | 5.42306117  |
| H | 3.13331651  | 0.40563641  | 5.79617323  |
| H | 2.71693518  | -0.46148443 | 4.29371911  |
| H | 0.24857705  | 3.24946072  | -6.00223380 |
| H | -1.20346619 | 4.56773473  | -2.23099190 |
| H | -1.34929480 | -0.37243957 | -5.12851165 |
| H | -0.84421345 | -1.45564475 | 5.32131598  |
| H | -1.38766387 | -3.12965019 | 5.54401278  |
| H | -1.83767498 | -2.22896065 | 4.06982256  |
| H | 0.57704738  | -4.46349205 | -3.11093111 |
| H | -0.37552997 | -4.48196963 | -5.41384860 |
| H | 1.73718963  | 4.22325701  | 5.20994079  |
| H | 2.40978280  | 3.05783174  | 6.37352291  |
| H | 0.70668211  | 2.93159845  | 5.86807207  |
| H | -1.26517726 | 2.33866165  | 0.86660540  |
| H | -1.02318206 | 4.03106907  | 0.40914858  |
| H | -1.55546884 | 3.62685813  | 2.06383814  |
| H | -4.83667614 | -0.60994689 | 4.70081479  |
| H | -4.24717620 | 0.51185407  | 5.95366468  |
| H | -3.29984902 | -0.94064845 | 5.53689952  |
| H | -1.32558375 | -2.09780156 | 0.26796406  |
| H | -2.87743757 | -2.93374661 | 0.08435614  |
| H | -1.99933661 | -3.04468280 | 1.62929212  |

|   |             |             |             |
|---|-------------|-------------|-------------|
| H | 1.87555260  | -4.47532788 | 0.70485265  |
| H | 2.74831849  | -3.41176431 | -0.43659168 |
| H | 1.03943860  | -3.09064221 | -0.03569077 |
| H | 0.56466557  | 5.10143608  | 3.45951977  |
| H | 1.04032271  | 5.72708419  | 1.86332139  |
| H | 2.27033950  | 5.03693482  | 2.94286566  |
| H | -4.66609131 | -2.20397078 | 2.92545903  |
| H | -5.33181865 | -2.08423384 | 1.27696448  |
| H | -5.48872174 | -0.71148442 | 2.39635565  |
| H | -1.32075141 | -2.45972399 | -6.37995619 |
| H | 0.56037111  | -2.33347622 | -1.82051638 |
| H | -0.94936963 | 1.03956304  | 5.32259107  |
| H | -2.10138883 | 2.34746010  | 5.64157297  |
| H | -1.02194446 | 2.43435906  | 4.22400426  |
| H | -4.08008266 | 1.15865252  | 0.25645771  |
| H | -4.31856047 | -0.29237000 | -0.75502618 |
| H | -2.70738248 | 0.46302886  | -0.65163902 |
| H | 2.63565471  | -3.86684129 | 5.08339964  |
| H | 1.23660600  | -3.92413167 | 6.17884516  |
| H | 2.04007486  | -2.37230643 | 5.83601426  |
| H | -0.50469941 | 5.08003183  | -4.53816930 |
| H | 4.18015474  | -2.51874797 | 3.64580655  |
| H | 4.76573023  | -3.16796509 | 2.09227097  |
| H | 3.64842361  | -4.12848082 | 3.08827723  |
| H | 2.46039763  | -0.12976192 | 0.53734549  |
| H | 4.02793637  | -0.94936072 | 0.46618182  |
| H | 3.57554654  | -0.05271709 | 1.93702891  |
| H | -0.52958122 | -4.66683865 | 2.40109236  |
| H | -0.30040560 | -5.41748378 | 4.00680326  |
| H | 1.07934169  | -5.23586314 | 2.89557852  |
| H | 4.33925984  | 1.84479801  | 2.82296622  |
| H | 4.65601919  | 2.55668079  | 4.42661808  |
| H | 3.92431779  | 3.53911351  | 3.13578513  |
| H | 3.02554647  | 3.11457889  | 0.50408722  |
| H | 1.78745108  | 4.00912363  | -0.42893118 |
| H | 1.69621637  | 2.23753070  | -0.30254106 |

**Compound 4**

|    |             |             |             |
|----|-------------|-------------|-------------|
| Th | 0.00000000  | 0.00000000  | 2.36739322  |
| C  | 0.00000000  | 0.00000000  | 0.00000000  |
| C  | 0.17314732  | 0.00933229  | -1.22374792 |
| C  | 0.32124163  | -0.10335879 | -2.61335178 |
| N  | -1.20462656 | -1.90038245 | 2.88982102  |
| N  | 2.30229067  | -0.11163034 | 2.71585493  |
| N  | -1.01058007 | 2.03853123  | 2.85577971  |
| Si | -2.35656244 | -1.97145256 | 4.20258928  |
| Si | 3.29631206  | 0.70610636  | 1.56332019  |
| Si | 2.97100571  | -1.04592685 | 3.99423481  |
| Si | -2.40255158 | 2.43047026  | 1.87517206  |

|    |             |             |             |
|----|-------------|-------------|-------------|
| Si | -0.41260722 | 3.11732665  | 4.08834625  |
| Si | -1.03727504 | -3.27975563 | 1.83372106  |
| C  | 0.41313942  | -1.44867451 | -3.19950436 |
| C  | 0.01507098  | -1.75226946 | -4.53052002 |
| H  | -0.37404070 | -0.99266983 | -5.20894971 |
| C  | 4.08574293  | -2.43056883 | 3.37748094  |
| H  | 3.55932319  | -3.05938536 | 2.63871991  |
| H  | 4.42352898  | -3.08289436 | 4.20397775  |
| H  | 4.98733122  | -2.03042410 | 2.87998230  |
| C  | 0.83373897  | -2.49710869 | -2.41689925 |
| H  | 1.15961271  | -2.27331788 | -1.39565609 |
| C  | -2.39610880 | -0.30327613 | 4.99733447  |
| H  | -1.42552084 | -0.04325030 | 5.46427133  |
| H  | -3.13871553 | -0.28839549 | 5.81804881  |
| H  | -2.65000821 | 0.52249830  | 4.31255096  |
| C  | 0.09316192  | -3.13434981 | -4.94131680 |
| H  | -0.22490362 | -3.33938999 | -5.97585983 |
| C  | 0.85842057  | -3.81202351 | -2.85478134 |
| H  | 1.19145122  | -4.62133511 | -2.19603551 |
| C  | 0.83609426  | 1.20760587  | -4.72038903 |
| H  | 1.30224862  | 0.32033001  | -5.16053792 |
| C  | 1.08962100  | 2.35165098  | 4.88053711  |
| H  | 0.83125884  | 1.42484431  | 5.42960042  |
| H  | 1.51169733  | 3.04589197  | 5.63149637  |
| H  | 1.89912745  | 2.09423973  | 4.17718045  |
| C  | 0.31778182  | 1.11677091  | -3.39952054 |
| C  | -0.15963985 | 3.49000917  | -3.55546832 |
| H  | -0.55545936 | 4.40463766  | -3.09977447 |
| C  | 0.25961586  | 3.45938500  | -4.83277515 |
| H  | 0.20817914  | 4.40288531  | -5.40397537 |
| C  | -1.92748242 | -3.18531489 | 5.61152203  |
| H  | -2.02723247 | -4.24071331 | 5.31017584  |
| H  | -2.61093517 | -3.01307762 | 6.46414391  |
| H  | -0.89521845 | -3.03259665 | 5.97159750  |
| C  | 0.73268002  | -3.35080007 | 1.27409598  |
| H  | 1.07904115  | -2.38932659 | 0.84668008  |
| H  | 0.85505815  | -4.09576757 | 0.46670177  |
| H  | 1.42268927  | -3.62206551 | 2.09269760  |
| C  | 3.92166344  | -0.08063961 | 5.30654711  |
| H  | 4.86228361  | 0.35085992  | 4.92685021  |
| H  | 4.17689925  | -0.75081626 | 6.14893022  |
| H  | 3.31349972  | 0.74739705  | 5.71011372  |
| C  | 2.49594937  | 2.20718215  | 0.98351008  |
| H  | 3.14749741  | 2.73132308  | 0.25882321  |
| H  | 2.28670142  | 2.92045941  | 1.80229095  |
| H  | 1.55097780  | 2.00727494  | 0.44493799  |
| C  | -1.82658968 | 3.53154085  | 0.38340707  |
| H  | -1.62864078 | 4.57463241  | 0.68715295  |
| H  | -2.55874485 | 3.54188542  | -0.44330899 |

|   |             |             |             |
|---|-------------|-------------|-------------|
| H | -0.88499700 | 3.10427866  | 0.00211641  |
| C | -1.47430191 | -4.95579130 | 2.65925683  |
| H | -0.82930582 | -5.17267943 | 3.52862133  |
| H | -1.31916755 | -5.76092187 | 1.91732343  |
| H | -2.52505092 | -5.01165661 | 2.98990460  |
| C | 4.99721210  | 1.26532157  | 2.29105732  |
| H | 4.88278914  | 1.96193695  | 3.14082190  |
| H | 5.56432901  | 1.79059974  | 1.50029815  |
| H | 5.61472130  | 0.41416005  | 2.62856521  |
| C | 0.81328699  | 2.39705705  | -5.43731374 |
| H | 1.20542828  | 2.44388346  | -6.45914950 |
| C | -0.14349385 | 2.29384749  | -2.82963333 |
| H | -0.52310770 | 2.26570872  | -1.80489803 |
| C | 1.54952842  | -1.83916572 | 4.92984389  |
| H | 0.89772439  | -1.09095777 | 5.42406900  |
| H | 1.94933314  | -2.47422503 | 5.74327564  |
| H | 0.89993791  | -2.47592250 | 4.30670346  |
| C | 3.69909317  | -0.46973117 | 0.14530063  |
| H | 4.07681393  | -1.43117098 | 0.53513344  |
| H | 4.45896825  | -0.06001698 | -0.54541984 |
| H | 2.78603740  | -0.67005168 | -0.44119524 |
| C | -1.56422621 | 3.42762637  | 5.51255762  |
| H | -2.47368202 | 3.98207352  | 5.22647757  |
| H | -1.04564157 | 4.02126362  | 6.28888761  |
| H | -1.89172010 | 2.48263611  | 5.98203095  |
| C | 0.42581050  | -4.06341706 | -4.17845182 |
| H | 0.44516446  | -5.10731907 | -4.52842292 |
| C | -3.80629424 | 3.29513140  | 2.80940001  |
| H | -4.13095439 | 2.70702895  | 3.68640689  |
| H | -4.67670873 | 3.40506945  | 2.13663820  |
| H | -3.53162847 | 4.30489212  | 3.16193790  |
| C | -3.09808494 | 0.88317233  | 1.19687052  |
| H | -2.36743435 | 0.32559827  | 0.57512519  |
| H | -3.94247581 | 1.12214677  | 0.52271115  |
| H | -3.49011380 | 0.19950263  | 1.97101794  |
| C | 0.01177133  | 4.80307697  | 3.35278286  |
| H | 0.69978926  | 4.70207146  | 2.49518814  |
| H | 0.48002640  | 5.47891418  | 4.09214166  |
| H | -0.90213052 | 5.29969133  | 2.97987659  |
| C | -4.05077374 | -2.40516306 | 3.62092838  |
| H | -4.41037018 | -1.69639978 | 2.85363777  |
| H | -4.78126779 | -2.39514029 | 4.45173525  |
| H | -4.08805862 | -3.41050498 | 3.16687362  |
| C | -2.10252997 | -3.09690562 | 0.29809690  |
| H | -3.17657250 | -3.00973658 | 0.54256392  |
| H | -1.97251230 | -3.94540684 | -0.39825406 |
| H | -1.79732896 | -2.18111782 | -0.23926795 |

## References

1. Turner, H. W.; Andersen, R. A.; Zalkin, A.; Templeton, D. H., Chloro-, methyl-, and (tetrahydroborato)tris((hexamethyldisilyl)amido)thorium(IV) and uranium(IV). Crystal structure of (tetrahydroborato)tris((hexamethyldisilyl)amido)thorium(IV). *Inorg. Chem.* **1979**, *18*, 1221-1224.
2. Andersen, R. A., Tris ((hexamethyldisilyl) amido) uranium (III): preparation and coordination chemistry. *Inorg. Chem.* **1979**, *18*, 1507-1509.
3. Huang, J.-H.; Lee, T.-Y.; Swenson, D. C.; Messerle, L., An alkylidene-tethered tantalananorbornadiene from reduction of a tantalum(phenylalkenyl)alkylidene derived from 3,3-diphenylcyclopropene ring opening by  $(\eta\text{-C}_5\text{Me}_4\text{R})_2\text{Ta}_2(\mu\text{-X})_4$  (Ta=Ta). *Inorg. Chim. Acta* **2003**, *345*, 209-215.
4. Barnett, N. D. R.; Mulvey, R. E.; Clegg, W.; O'Neil, P. A., Crystal structure of lithium diisopropylamide (LDA): an infinite helical arrangement composed of near-linear nitrogen-lithium-nitrogen units with four units per turn of helix. *J. Am. Chem. Soc.* **1991**, *113*, 8187-8188.
5. Harris, R. K.; Becker, E. D.; De Menezes, S. M. C.; Granger, P.; Hoffman, R. E.; Zilm, K. W., Further Conventions for NMR Shielding and Chemical Shifts (IUPAC Recommendations 2008). *Magn. Reson. Chem.* **2008**, *46*, 582-598.
6. Harris, R. K.; Becker, E. D.; Cabral de Menezes, S. M.; Goodfellow, R.; Granger, P., NMR nomenclature: nuclear spin properties and conventions for chemical shifts. IUPAC Recommendations 2001. International Union of Pure and Applied Chemistry. Physical Chemistry Division. Commission on Molecular Structure and Spectroscopy. *Magn. Reson. Chem.* **2002**, *40*, 489-505.
7. *SMART Apex II*, Version 2.1 ed.; Bruker AXS Inc.: Madison WI, 2005.
8. *SAINT Software User's Guide*, Version 7.34a ed.; Bruker AXS Inc.: Madison, WI, 2005.
9. Sheldrick, G. M., *SADABS*, the Siemens Area Detector Absorption Correction; University of Göttingen: Göttingen, Germany, 2005.
10. *SHELXTL PC*, Version 6.12 ed.; Bruker AXS Inc.:Madison, WI, 2005.
11. Frisch, M.; Trucks, G.; Schlegel, H.; Scuseria, G.; Robb, M.; Cheeseman, J.; Scalmani, G.; Barone, V.; Petersson, G.; Nakatsuji, H., Gaussian 16. Gaussian, Inc. Wallingford, CT: 2016.
12. Paier, J.; Hirschl, R.; Marsman, M.; Kresse, G., The Perdew–Burke–Ernzerhof exchange-correlation functional applied to the G2-1 test set using a plane-wave basis set. *J. Chem. Phys.* **2005**, *122*, 234102.
13. Cao, X.; Dolg, M., Valence basis sets for relativistic energy-consistent small-core lanthanide pseudopotentials. *J. Chem. Phys.* **2001**, *115*, 7348-7355.
14. Rassolov, V. A.; Pople, J. A.; Ratner, M. A.; Windus, T. L., 6-31G\* basis set for atoms K through Zn. *J. Chem. Phys.* **1998**, *109*, 1223-1229.
15. Grimme, S.; Ehrlich, S.; Goerigk, L., Effect of the damping function in dispersion corrected density functional theory. *J. Comput. Chem.* **2011**, *32*, 1456-1465.
16. Glendening, E. D.; Landis, C. R.; Weinhold, F., NBO 6.0: Natural bond orbital analysis program. *J. Comput. Chem.* **2013**, *34*, 1429-1437.
17. Lu, T.; Chen, F., Multiwfn: A multifunctional wavefunction analyzer. *J. Comput. Chem.* **2012**, *33*, 580-592.

18. Baerends, E. J.; Ziegler, T.; Atkins, A. J.; Autschbach, J.; Baseggio, O.; Bashford, D.; Bérces, A.; Bickelhaupt, F. M.; Bo, C.; Boerrigter, P. M.; Cavallo, L.; Daul, C.; Chong, D. P.; Chulhai, D. V.; Deng, L.; Dickson, R. M.; Dieterich, J. M.; Ellis, D. E.; Faassen, M. v.; Fan, L.; Fischer, T. H.; Guerra, C. F.; Franchini, M.; Ghysels, A.; Giammona, A.; Gisbergen, S. J. A. v.; Goetz, A.; Götz, A. W. G., J. A.; Gritsenko, O. V.; Grüning, M.; Gusarov, S.; Harris, F. E.; Hoek, P. v. d.; Hu, Z.; Jacob, C. R.; Jacobsen, H.; Jensen, L.; Joubert, L.; Kaminski, J. W.; Kessel, G. v.; König, C.; Kootstra, F.; Kovalenko, A.; Krykunov, M. V.; Lenthe, E. v.; McCormack, D. A.; Michalak, A.; Mitoraj, M.; Morton, S. M.; Neugebauer, J.; Nicu, V. P.; Noodleman, L.; Osinga, V. P.; Patchkovskii, S.; Pavanello, M.; Peeples, C. A.; Philipsen, P. H. T.; Post, D.; Pye, C. C.; Ramanantoanina, H.; Ramos, P.; Ravenek, W.; Rodríguez, J. I.; Ros, P.; Rüger, R.; Schipper, P. R. T.; Schlüns, D.; Schoot, H. v.; Schreckenbach, G.; Seldenthuis, J. S.; Seth, M.; Snijders, J. G.; Solà, M.; Stener, M.; Swart, M.; Swerhone, D.; Tognetti, V.; Velde, G. t.; Vernooijs, P.; Versluis, L.; Visscher, L.; Visser, O.; Wang, F.; Wesolowski, T. A.; Wezenbeek, E. M. v.; Wiesenekker, G.; Wolff, S. K.; Woo, T. K.; Yakovlev, A. L.; , Amsterdam Density Functional. 2017 ed.; SCM, Theoretical Chemistry, Vrije Universiteit Amsterdam, The Netherlands,. . **2017**.
19. Lenthe, E. v.; Baerends, E. J.; Snijders, J. G., Relativistic regular two - component Hamiltonians. *J. Chem. Phys.* **1993**, *99*, 4597-4610.
20. Weigend, F.; Ahlrichs, R., Balanced basis sets of split valence, triple zeta valence and quadruple zeta valence quality for H to Rn: Design and assessment of accuracy. *Phys. Chem. Chem. Phys.* **2005**, *7*, 3297-3305.
21. Pye, C. C.; Ziegler, T., An implementation of the conductor-like screening model of solvation within the Amsterdam density functional package. *Theor. Chem. Acc.* **1999**, *101*, 396-408.
22. Autschbach, J.; Zheng, S., Analyzing Pt chemical shifts calculated from relativistic density functional theory using localized orbitals: The role of Pt 5d lone pairs. *Magn. Reson. Chem.* **2008**, *46*, S45-S55.
23. Autschbach, J., Analyzing NMR shielding tensors calculated with two-component relativistic methods using spin-free localized molecular orbitals. *J. Chem. Phys.* **2008**, *128*, 164112.
24. Kent, G. T.; Yu, X.; Wu, G.; Autschbach, J.; Hayton, T. W., Synthesis of Parent Acetylide and Dicarbide Complexes of Thorium and Uranium and an Examination of Their Electronic Structures. *Inorg. Chem.* **2021**, *In press*.
25. Wiberg, K. B.; Hammer, J. D.; Zilm, K. W.; Cheeseman, J. R., NMR Chemical Shifts. 3. A Comparison of Acetylene, Allene, and the Higher Cumulenes. *J. Org. Chem.* **1999**, *64*, 6394-6400.
26. van Dongen, J. P. C. M.; van Dijkman, H. W. D.; de Bie, M. J. A., Characteristic <sup>13</sup>C chemical shifts and <sup>13</sup>C–H coupling constants in organolithium compounds. *Recl. Trav. Chim. Pays-Bas* **1974**, *93*, 29-32.
